# Supplementary material for: A striatal circuit balances learned fear in the presence and absence of sensory cues
Source: eLife. 2023 Jan 19;12:e75703. doi: 10.7554/eLife.75703 (PMC9897731; doi:10.7554/eLife.75703)
Supplement: Figure 1—source data 1. [file elife-75703-fig1-data1.xlsx]

## Sheet: Figure 1J vs 1K tone_peak_Data
	Figures 1J, 1K: differences between Z-scores at the peak response (200 ms after CS) and the last point before the CS (at -100 ms) for the top responding cells
	Training (Fig 1J, n=17)	Training (Fig 1K, n=19)
	0.395661	1.2905
	0.298941	0.825725
	-0.0136464	0.563072
	0.0259903	0.58298
	0.036946	0.393724
	0.0775374	0.483386
	-0.0117522	0.391366
	-0.0264037	0.0307623
	0.167076	0.349999
	0.165033	0.388854
	-0.0334696	0.392331
	0.0392892	-0.0726053
	0.176245	0.305432
	0.0482467	0.307654
	-0.0715473	0.187622
	-0.0207194	0.113586
	0.328206	0.203344
		0.0597654
		0.159696

## Sheet: Figure 1J vs 1K tone_peak_Stats
	Figure 1J vs Figure 1K, baseline-corrected peak Z-scores
					Mann-Whitney test
	Shapiro-Wilk normality test	Training (Fig 1J, n=17)	Training (Fig 1K, n=19)		P value	0.001
	W	0.8776	0.8893		Exact or approximate P value?	Exact
	P value	0.0291	0.0313		P value summary	**
	Passed normality test (alpha=0.05)?	No	No		Significantly different (P < 0.05)?	Yes
	P value summary	*	*		One- or two-tailed P value?	Two-tailed
					Sum of ranks in column A,B	214 , 452
					Mann-Whitney U	61
	Descriptive statistics	Training (Fig 1J, n=17)	Training (Fig 1K, n=19)
	Number of values	17	19		Difference between medians
					Median of column A	0.03929, n=17
	Minimum	-0.07155	-0.07261		Median of column B	0.3500, n=19
	25% Percentile	-0.01718	0.1597		Difference: Actual	0.3107
	Median	0.03929	0.35		Difference: Hodges-Lehmann	0.2287
	75% Percentile	0.1717	0.4834		95.14% CI of difference	0.09339 to 0.3792
	Maximum	0.3957	1.291		Exact or approximate CI?	Exact
	Mean	0.09304	0.3662
	Std. Deviation	0.1397	0.3108
	Std. Error of Mean	0.03388	0.0713
	Lower 95% CI	0.0212	0.2164
	Upper 95% CI	0.1649	0.516
	Mean ranks	12.59	23.79

## Sheet: Figure 1L tone_Data
	Figure 1L
		Resp	nonResp
	Hab	6	170
	Train	17	146
	Ret	19	158

## Sheet: Figure 1L tone_Stats
	Figure 1L
	Test	Chi-square test
	Chi-square, df	8.004, 2
	P value	0.0183
	P value summary	*
	One- or two-sided	NA
	Statistically significant (P < 0.05)?	Yes
	Data analyzed
	Number of rows	3
	Number of columns	2

## Sheet: Figure 1S mov_Data
	Figure 1S
	during CS
		Resp	nonResp
	Hab	17	159
	Train	34	129
	Ret	30	147
	outside CS
		Resp	nonResp
	Hab	10	166
	Train	5	158
	Ret	3	174

## Sheet: Figure 1S mov_Stats
	Figure 1S
	during CS
	Test	Chi-square test
	Chi-square, df	8.340, 2
	P value	0.0155
	P value summary	*
	One- or two-sided	NA
	Statistically significant (P < 0.05)?	Yes
	Data analyzed
	Number of rows	3
	Number of columns	2
	outside CS
	Test	Chi-square test
	Chi-square, df	4.292, 2
	P value	0.117
	P value summary	ns
	One- or two-sided	NA
	Statistically significant (P < 0.05)?	No
	Data analyzed
	Number of rows	3
	Number of columns	2

## Sheet: Figure 1U cond_activity_Data
	Figure 1U, Figure 1 - figure supplement 4
	Frz_CS_Hab	Mov_CS_Hab	Frz_noCS_Hab	Mov_noCS_Hab	Frz_CS_Train	Mov_CS_Train	Frz_noCS_Train	Mov_noCS_Train	Frz_CS_Ret	Mov_CS_Ret	Frz_noCS_Ret	Mov_noCS_Ret
	0.0699519	0.289208	0.0671974	0.23377	0.0895071	0.333644	0.0689712	0.195475	0.978223	1.5834	0.247737	0.256736
	0.13805	0.353312	0.193874	0.344887	0.582675	0.251901	0.155312	0.0744223	0.518021	1.22966	0.0981599	0.328179
	0.0688409	0.256576	0.0628019	0.287474	0.238662	0.374689	0.148019	0.227531	0.0729761	0.0421545	0.0886792	0.202407
	0.636155	0.646452	0.40084	0.592182	0.155996	0.292194	0.0932343	0.185163	0.260261	0.897604	0.151845	0.492987
	0.119303	0.197296	0.0926575	0.340693	0.189827	0.293345	0.266326	0.226927	0.245905	0.314359	0.196418	0.508611
	0.0309688	0.0474047	0.0218318	0.143712	0.228243	0.623747	0.25101	0.35369	0.157047	0.444404	0.0408212	0.411351
	0.13106	0.272429	0.103813	0.153633	0.04218	0.39859	0.0587813	0.0947131	0.0834929	0.173145	0.165461	0.315319
	0.249664	0.420945	0.269189	0.341023	0.145478	0.254634	0.270813	0.175797	0.109574	0.166555	0.169081	0.259761
	0.144484	0.0248097	0.0248835	0.3725	0.149075	0.320987	0.158299	0.149173	0.180004	0.0288104	0.11646	0.221231
	0.17011	0.312539	0.226624	0.334878	0.0209368	0.658378	0.0531566	0.203421	0.195414	0.405183	0.199434	0.328497
	0.281556	0.550949	0.305228	0.435734	0.221307	0.555372	0.188203	0.0972038	0.160956	0.113993	0.297317	0.279002
	0.00321239	0.307569	0.00689087	0.168675	0.0814811	0.454617	0.0378548	0.10473	0.121557	0.777688	0.17613	0.174341
	0.0881994	0.154398	0.152851	0.33449	0.141266	0.784321	0.167741	0.263842	0.191256	0.2422	0.128707	0.299314
	0.224176	0.301184	0.29327	0.468162	0.39664	0.137976	0.209541	0.312043	0.1503	0.270398	0.114594	0.326371
	0.623842	0.59081	0.500159	0.679027	0.0601253	0.247689	0.270655	0.292002	0.217223	0.589946	0.219962	0.266944
	0.78198	1.00289	0.65385	0.753487	0.0899062	0.33502	0.118132	0.174543	0.0812243	0.0564079	0.106064	0.307935
	0.272517	0.303252	0.55572	0.464898	0.282937	0.178555	0.683933	0.274341	0.39474	0.717851	0.319926	0.500479
	0.34238	0.452578	0.297357	0.403345	0.256667	0.0936217	0.349759	0.269494	0.10901	0.334087	0.266481	0.348193
	0.331913	0.323096	0.445627	0.533393	0.324455	0.315233	0.341337	0.424338	0.680759	0.313471	0.253139	0.322479
	0.641562	0.638475	0.705139	0.704543	0.222404	0.22012	0.230627	0.250779	0.372587	0.466402	0.481703	0.595811
	0.314091	0.49056	0.44719	0.419673	0.170542	0.0568889	0.0450919	0.0969956	0.126496	0.609465	0.144678	0.171283
	0.601637	0.720826	0.58724	0.69117	0.0904588	0.0722144	0.0439369	0.0413684	0.0990956	0.745729	0.125037	0.174444
	0.439233	0.555642	0.649264	0.457163	0.0663364	0.0801646	0.0842896	0.144453	0.546611	0.363176	0.401471	0.104496
	0.466149	0.400554	0.397044	0.471852	0.363084	0.830144	0.376484	0.522174	0.591992	1.0085	0.331776	0.678917
	1.47272	1.48286	1.08741	1.31656	0.441581	0.158107	0.59037	0.399667	0.270181	1.47462	0.26157	0.202186
	0.590208	0.775942	0.599702	0.632032	0.314507	0.233948	0.311444	0.314878	0.0692706	0.757191	0.100594	0.128579
	0.319701	0.33759	0.336776	0.568171	0.312228	0.992434	0.367358	0.308917	0.1888	0.586021	0.406875	0.543538
	0.247154	0.350508	0.272177	0.541997	0.339202	0.504332	0.326735	0.370476	0.0566478	0.986517	0.0581559	0.165172
	0.408504	0.293785	0.561846	0.556908	0.366836	0.189447	0.442367	0.370543	0.0374656	0.736729	0.115365	0.0736135
	0.544224	0.54685	0.544488	0.489197	0.310136	0.38951	0.291943	0.379347	0.323447	1.13479	0.298658	0.459452
	0.211121	0.265244	0.195043	0.27106	0.16737	0.170578	0.138157	0.158157	0.11562	0.182936	0.104116	0.451064
	0.571127	0.420232	0.540552	0.672947	0.695087	0.495715	0.384753	0.440338	0.266186	0.38003	0.162435	0.571822
	0.501059	0.724262	0.6842	0.570014	0.230647	0.116041	0.152462	0.108342	0.0988692	0.626387	0.105443	0.257154
	0.701708	0.517197	0.653676	0.756137	0.0395277	0.0683597	0.105675	0.122237	0.101818	0.208217	0.241169	0.202798
	1.04271	0.813274	0.85615	0.796317	0.185939	0.182159	0.122449	0.162772	1.11388	0.447702	0.540982	0.144894
	0.109854	0.293454	0.172528	0.333644	0.31254	0.260134	0.15462	0.197586	0.406695	1.15087	0.26532	0.602575
	0.351816	0.287365	0.60536	0.39322	0.92401	0.759721	0.511885	0.377562	0.173835	0.318534	0.0959578	0.219469
	0.664942	0.608072	0.613832	0.825437	0.547987	0.548091	0.591138	0.422195	0.832595	0.0564946	0.465695	0.114424
	0.00221112	0.204428	0.00484932	0.131005	0.529429	0.899915	0.546067	0.634646	0.0845539	0.00959507	0.175374	0.205652
	0.215751	0.387992	0.266578	0.35796	0.121076	0.450877	0.519688	0.316251	0.0979726	0.253298	0.160284	0.174043
	0.137013	0.330311	0.0839934	0.330941	0.224667	0.120971	0.170849	0.142209	0.184673	0.117283	0.214829	0.34234
	0.0578156	0.240491	0.090177	0.226383	0.246557	0.10958	0.127462	0.185023	0.10129	0.642174	0.0676733	0.287877
	0.118133	0.573065	0.204438	0.331279	0.361054	0.62003	0.386134	0.486738	0.0872271	0.677429	0.0712823	0.237385
	1.04302	0.171084	0.0217843	0.0589374	0.211398	0.147751	0.334066	0.275602	0.0522204	0.231432	0.0664868	0.261956
	0.851642	0.224383	0.061934	0.115777	0.429945	0.339004	0.206881	0.253881	0.241564	0.243021	0.295423	0.144751
	1.58218	0.385931	0.0722822	0.166643	0.24204	0.314539	0.234509	0.149326	0.50132	0.747976	0.448201	0.460926
	3.28689	0.595084	0.950772	0.216174	0	0	0.0060673	0.194123	0.557713	0.703196	0.566058	0.761544
	0.169128	0.329494	0.320821	0.323821	0.0580912	0.21109	0.0398293	0.198162	0.169167	0.156224	0.258852	0.183967
	0.0396903	0.301244	0.0829182	0.121287	0.080133	0.229208	0.0210531	0.174793	0.049009	0.0635072	0.0611362	0.381988
	0.148284	0.556996	0.372049	0.515543	0.173797	0.166899	0.416232	0.425598	0.223529	0.259999	0.277842	0.375737
	0.152064	0.292737	0.18954	0.274256	0.0667633	0.365273	0.028294	0.0350511	0.485814	0.382001	0.601904	0.450108
	0.385579	0.45193	0.423591	0.459565	0.0140741	0.213523	0.124793	0.165069	0.655342	0.761069	0.213309	0.182005
	0.249049	0.381167	0.229394	0.318684	0.727707	0.94599	0.262737	0.318744	0.149588	0.184899	0.387133	0.201093
	0.029174	0.243392	0.171083	0.383244	0.193674	0.415803	0.21436	0.279026	0.0429534	0.0786272	0.18491	0.0582744
	0.288045	0.609493	0.206332	0.352578	0.115242	0.106586	0.144375	0.223019	0.0607548	0.0380919	0.0247393	0.124102
	0.904204	0.651879	0.401055	0.509162	0.176404	0.703048	0.104066	0.316912	0.231869	0.342926	0.0792307	0.219344
	0.025707	0.384687	0.0612148	0.172122	0.618949	0.95347	0.257352	0.59753	0.470955	0.453436	0.331895	0.450485
	0.416198	0.122643	0.00567322	0.0341175	0.15627	0.44163	0.170263	0.388152	0.0386708	0.0213001	0.128409	0.190363
	0.0713987	0.223799	0.233512	0.226144	0.0796659	0.152883	0.261756	0.249197	0.138939	0.0390728	0.159165	0.29439
	0.0227187	0.130406	0.14444	0.250633	0.387832	0.270581	0.451325	0.319745	0.463897	0.512134	0.422244	0.481955
	0.00453953	0.131639	0.138275	0.11888	0.174596	0.529631	0.153174	0.197822	0.22148	0.45005	0.335745	0.497362
	0.0106142	0.151174	0.0562345	0.0959736	0.0790226	0.373782	0.0584333	0.130865	0.324214	0.390379	0.491034	0.480763
	0	0.242533	0.0600334	0.194217	0.266817	0.183187	0.698366	0.153245	0.245311	0.349082	0.304062	0.486264
	0.165084	0.158742	0.106408	0.316813	1.20361	0.510741	0.189829	0.197179	0.778919	0.0926501	0.440546	0.128399
	0.181459	0.312035	0.195509	0.307566	0.123781	0.150719	0.329515	0.143166	0.122311	0.139127	0.0966564	0.246516
	0.361176	0.52712	0.249696	0.490257	0.244558	0.167205	0.262695	0.145411	0.0482438	0.0707034	0.0469547	0.239587
	0	0.192216	0	0.1687	0.0797783	0.0326442	0.111693	0.191981	0.0122078	0.284018	0.0201956	0.410968
	0.154592	0.222096	0.191659	0.343244	0.183293	0.177696	0.742251	0.161764	0.129238	0.121376	0.17536	0.287537
	0.541795	0.746639	0.624182	0.53287	0.889266	0.818704	0.448493	0.668615	0.247287	0.352538	0.254544	0.365937
	0.182478	0.588081	0.384888	0.354718	0.681876	0.405536	0.357423	0.39823	0.1295	0.112577	0.121404	0.369281
	0.386261	0.65622	0.41859	0.395412	0.0042141	0.101061	0.0157062	0.189527	0.0247942	0.00738505	0.0404806	0.212865
	0.252882	0.643114	0.31386	0.480373	0.537492	0.57975	0.388329	0.429449	0.0606302	0.207891	0.14358	0.297232
	0.543432	0.67642	0.421393	0.413028	0.332368	0.534881	0.295159	0.196766	0.42694	0.980272	0.319965	0.412051
	0.169746	0.442975	0.257779	0.331976	0.278647	0.605341	0.23699	0.304893	0.653538	1.20888	0.132358	0.289373
	0.0786688	0.326901	0.155643	0.144467	0.435096	0.676468	0.128923	0.37602	0.12647	0.0485723	0.0604428	0.118339
	0.0372811	0.129535	0.100309	0.190916	0.209566	0.560526	0.113723	0.334339	0.0631223	0.149315	0.0571399	0.100365
	0.10155	0.130412	0.0926213	0.260035	0.0983395	0.266696	0.191762	0.4545	0.477922	0.703843	0.199608	0.509164
	0.0602938	0.260674	0.0745223	0.300423	0.0507721	0.127126	0.114391	0.15759	0.115136	0.333802	0.354988	0.53162
	0.64431	0.608151	0.759182	0.377012	0.333845	0.28292	0.233427	0.264354	0.693908	1.40607	0.274683	0.287572
	0.0884889	0.487235	0.0620499	0.366856	0.556673	0.922137	0.285448	0.496127	0.275203	1.4949	0.250475	0.236664
	0.0828337	0.0772234	0.078591	0.21031	0.515594	0.464359	0.426692	0.392321	0.570371	0.886356	0.248236	0.27859
	0.0949821	0.237978	0.168801	0.278568	0.30287	0.294893	0.110628	0.227832	0.220857	1.07625	0.215813	0.430561
	0.0570534	0.0378624	0.0706457	0.136114	0.320191	0.45939	0.16306	0.305636	1.03802	2.15474	0.10534	0.172994
	0.395365	0.466918	0.438686	0.541491	0.414327	0.743691	0.306665	0.380311	0.0256052	0.0532399	0.0624208	0.116303
	0.14524	0.104087	0.112654	0.203672	0.807659	0.986105	0.417811	0.394155	0.0482859	0.0726676	0.0241173	0.117561
	0.370393	0.727391	0.261317	0.589157	0.43381	0.539442	0.178505	0.253285	0.17679	0.252214	0.213598	0.437613
	0.272009	0.72576	0.235862	0.338986	0.209909	0.245011	0.107738	0.138402	0.248793	0.387265	0.265126	0.432452
	0.0567319	0.0557507	0.0449101	0.0930568	0.0496228	0.0829094	0.160276	0.119359	0.0471069	0.0136657	0.0493899	0.326897
	0.444219	0.5599	0.513228	0.624734	0.110391	0.0857716	0.11861	0.0669749	0.135553	0.254923	0.239707	0.339552
	0.615257	0.43601	0.306789	0.438632	0.946331	0.60793	0.317939	0.242003	0.0990445	0.138117	0.135605	0.254731
	0.358467	0.29237	0.209671	0.229709	0.178619	0.0987437	0.133822	0.083357	0.0808264	0.0690444	0.131296	0.234401
	0.152117	0.177979	0.159328	0.236445	0.608275	0.52197	0.251337	0.269327	0.158655	0.143638	0.14924	0.396476
	0.160998	0.426037	0.327746	0.405276	0.471598	0.669931	0.158123	0.435908	0.442724	0.735847	0.331517	0.457416
	0.126993	0.24918	0.124373	0.255354	0.0848239	0.222187	0.116189	0.259706	0.402035	1.27762	0.30656	0.489337
	0.680611	0.13097	0.677201	0.0282752	0.145224	0.627342	0.270101	0.27142	0.0510338	0.149019	0.0761312	0.180343
	0.256273	0.117847	0.129463	0.309425	0.163305	0.12522	0.0842115	0.0564317	0.0693242	0.504816	0.291931	0.594251
	0.0862889	0.316919	0.10329	0.285596	0.367605	0.492366	0.14905	0.240698	0.261738	0.261398	0.287552	0.323723
	0.557949	0.432797	0.298231	0.26754	0.166497	0.327243	0.0699883	0.123155	0.112326	0.230223	0.0854898	0.614276
	0.228095	0.188139	0.105243	0.170588	0.0480919	0.19148	0.0899776	0.0360121	0.50405	0.283775	0.46991	0.48387
	0.11529	0.124835	0.151717	0.189673	0.841046	0.817052	0.306603	0.515941	0.220992	0.335533	0.246181	0.435737
	0.0361362	0.157155	0.136035	0.174457	0.26634	0.304531	0.595013	0.617617	0.187402	0.467818	0.225485	0.593019
	0.0653823	0.173426	0.143881	0.209043	0.157437	0.351988	0.218833	0.260018	0.644166	0.524591	0.590476	0.478511
	0.11105	0.0748526	0.0997579	0.152996	0.595283	0.310555	0.656566	0.14363	0.123472	0.124913	0.087294	0.32222
	0.672343	0.732574	0.745915	0.703371	0.297642	0.539235	0.162242	0.148215	0.14748	0.131796	0.422723	0.258979
	0.423969	0.519855	0.313452	0.557551	0.153814	0.369781	0.263307	0.148165	0.0858319	0.117854	0.283771	0.479292
	0.418117	0.42287	0.425164	0.581449	0.783334	0.836357	0.332363	0.469142	0.0544298	0.809883	0.036308	0.179416
	0.703797	0.708247	0.399548	0.575466	0.100912	0.655975	0.0772456	0.24457	0.0654298	0.0951917	0.476088	0.151599
	0.609526	0.371518	1.02135	0.366074	0.0847901	0.410735	0.184826	0.292173	0.00225237	0.00222578	0.0441532	0.163721
	0.699926	0.668951	0.813953	0.616579	0.125552	0.597963	0.123887	0.348576	0.0338569	0.0280738	0.309608	0.242756
	0.13317	0.233175	0.168995	0.289877	0.111878	0.237933	0.0930018	0.194796	0.150571	0.445583	0.414973	0.324974
	0.133748	0.268746	0.112471	0.362954	0.232601	0.485087	0.254906	0.404147	0.322273	0.525993	0.712328	0.667155
	0.0998304	0.231336	0.147584	0.298588	0.446543	0.605851	0.780318	0.693027	0.0276857	0.20733	0.0439123	0.214293
	0.203462	0.544553	0.311052	0.626202	0.0861583	0.422407	0.253178	0.0345566	0.281243	0.310358	0.337352	0.186959
	0.0375631	0.157457	0.0341752	0.241725	0.178136	0.192595	0.278465	0.236282	0.190142	0.338896	0.426954	0.318283
	0.232603	0.257646	0.249112	0.311704	0.0703263	0.273649	0.122031	0.173638	0.0192769	0.0557849	0.14135	0.244909
	0.036695	0.303265	0.126962	0.327964	0.0152683	0.1635	0.0436184	0.0197675	0.123867	0.1195	0.220735	0.258201
	0.591914	0.353593	0.382401	0.603137	0.265167	0.363985	0.344819	0.283684	0.229688	0.0576557	0.281311	0.101706
	0.285553	0.202209	0.486347	0.450189	0.36313	0.70373	0.205676	0.357723	0.318925	0.153515	0.50372	0.2458
	0.271085	0.107666	0.130941	0.30973	0.27139	0.747373	0.376387	0.272992	0.135421	0.307131	0.537172	0.179231
	0.203666	0.13889	0.232938	0.17183	0.266818	0.715697	0.481052	0.344242	0.0143686	0.108627	0.474252	0.0786676
	0.129654	0.360882	0.370337	0.412339	0.0796186	0.0397786	0.111215	0.101126	0.297218	0.372633	0.374847	0.527151
	0.556186	0.390755	0.654854	0.613808	0.0902276	0.235137	0.114342	0.161879	0.694569	0.844566	0.674452	1.00255
	0.28928	0.284268	0.437332	0.505162	0.0172054	0.0473441	0.0261566	0.191092	0.186245	0.495337	0.432643	0.284451
	0.0028621	0.0923185	0.118334	0.168077	0.590192	0.265194	0.400393	0.190962	0.0262308	0.926409	0.0709123	0.427445
	0.624488	0.136981	0.220735	0.25856	0.815575	0.808918	0.620894	0.627294	0.127267	0.0872611	0.128608	0.209719
	0.035706	0.0207275	0.0189964	0.206889	0.0793864	0.3424	0.120934	0.048776	0.654745	0.412863	0.944607	0.372889
	0.255507	0.206564	0.103795	0.334762	0.0647928	0.188383	0.122244	0.10073	0.117545	0.421881	0.289659	0.389705
	0.377332	0.369036	0.219573	0.320617	0.0444035	0.211513	0.0867226	0.159152	0.0792257	0.164839	0.317568	0.262972
	0.252886	0.268664	0.243413	0.271473	0.153736	0.651203	0.396746	0.164596	0.00574782	0.234238	0.134199	0.14208
	0.0152054	0.0703692	0.0368638	0.12399	0.042091	0.0971996	0.447737	0.234656	0.174919	0.105455	0.492834	0.259851
	0.374233	0.249887	0.43521	0.27418	0.509636	0.627612	0.330152	0.156505	0.266699	0.259492	0.38431	0.19679
	0.065931	0.126101	0.0318168	0.298218	0.162691	0.256532	0.562973	0.241154	0.19883	0.368429	0.41828	0.442495
	0.295887	0.319888	0.530336	0.450771	0.199631	0.101283	0.249278	0.131434	0.470347	0.245541	0.777642	0.403137
	0.0434644	0.177634	0.255535	0.369877	0.179209	0.117744	0.138435	0.129401	0.396885	0.422949	0.445034	0.231909
	0.226973	0.17472	0.557896	0.258273	0.181738	0.269367	0.391199	0.154903	0.018295	0.0645586	0.15652	0.229218
	0.0636119	0.105853	0.174899	0.160028	0.0447398	0.166962	0.0811422	0.0536476	0.0116081	0.0664415	0.151891	0.267758
	0.0950869	0.160826	0.0373139	0.164227	0.309042	0.729146	0.307296	0.374574	0.162073	0.546999	0.398737	0.457985
	0.074696	0.140514	0.0273516	0.118316	0.201669	0.594404	0.151811	0.349501	0.110285	0.0758144	0.548313	0.17063
	0.153946	0.394278	0.123812	0.429002	0.0304183	0.48864	0.0600072	0.245937	0.0301669	0.427957	0.108658	0.20488
	0.0835485	0.219609	0.171327	0.31257	0.543167	0.439405	0.499842	0.365443	0.0340549	0.194093	0.105255	0.127563
	0.0275951	0.125984	0.0695701	0.120319	0.119019	0.25837	0.314374	0.257801	0.424986	0.388089	0.550664	0.425871
	0.233389	0.177386	0.599228	0.193347	0.030813	0.349324	0.03782	0.174879	0.290415	0.290929	0.36408	0.306282
	0.425086	0.309477	0.208075	0.204196	0.115666	0.599826	0.19861	0.491838	0.229457	0.277168	0.629397	0.329014
	0.196593	0.52833	0.50225	0.439773	0.187096	0.649233	0.385214	0.225299	0.0830688	0.206048	0.265637	0.186306
	0.100379	0.130049	0.0588776	0.271588	0.0390755	0.229732	0.0940339	0.0418871	0.365022	0.445418	0.603152	0.368769
	0.0964286	0.390274	0.0514596	0.213611	0.111261	0.145045	0.298833	0.182151	0.097811	0.196983	0.139339	0.3026
	0.022577	0.282723	0.118913	0.153559	0.0442255	0.141566	0.0326571	0.0886856	0.198295	0.247234	0.278088	0.276422
	0.350792	0.115672	0.292131	0.26881	0.0417782	0.0154036	0.107678	0.0239405	0.00167637	0.00347978	0.14829	0.266658
	0.2509	0.241385	0.237528	0.0947608	0.0139353	0.00424622	0.166837	0.0175693	0.184246	0.271295	0.399945	0.270715
	0.0259985	0.151181	0.0291015	0.108272	0.226321	0.124288	0.12889	0.157331	0.278465	0.69424	0.0490843	0.23126
	0.0436069	0.233332	0.167267	0.16955	0.431007	0.580835	0.451068	0.479068	0.146188	0.311192	0.111983	0.478436
	0.169467	0.199523	0.166524	0.203211	0.0890736	0.286264	0.114502	0.257389	0.141141	0.345417	0.108954	0.506501
	0.164231	0.49738	0.329465	0.426293	0.0316121	0.154483	0.108129	0.357186	0.0789349	0.0533391	0.22478	0.214948
	0.332815	0.554684	0.748596	0.579633	0.030895	0.0233011	0.0789955	0.0309055	0.177514	0.150804	0.127159	0.233975
	0.0595454	0.247769	0.0713287	0.245713	0.0658664	0.0259395	0.150652	0.0373438	0.100829	0.0452845	0.0890728	0.336199
	0.102954	0.43129	0.085097	0.234651	0.245875	0.149118	0.400393	0.175121	0.492578	0.409284	0.339973	0.264056
	0.0258124	0.243185	0.145934	0.359345	0.118505	0.130203	0.408123	0.130859	0.267148	0.243332	0.575609	0.26292
	0.0920066	0.556638	0.186822	0.389323	0.235717	0.388531	0.269588	0.360071	0.243878	0.167524	0.318525	0.238796
	0.0709841	0.359708	0.110095	0.3684	0.0737267	0.168941	0.104299	0.22155	0.454717	0.703038	0.341793	0.970871
	0.00694197	0.118628	0.0330555	0.335682	0.21843	0.35401	0.405787	0.365621	0.0688136	0.413146	0.037077	0.322905
	0.295902	0.336647	0.145651	0.378628	0.177701	0.115639	0.332384	0.0891377	0.0718327	0.962829	0.303195	0.136918
	0.0777107	0.284733	0.277839	0.348297	0.292603	0.189823	0.298505	0.189741	0	0.802987	0.0793901	0.218497
	0.0386704	0.325484	0.0564823	0.235319	0.168668	0.107726	0.195113	0.207636	0.0324859	0.0307134	0.108738	0.168622
	0.0782452	0.546773	0.133694	0.359138					0.0240411	0.267454	0.0914484	0.279251
	0.160626	0.379914	0.180206	0.387246					0.19912	0.216755	0.155438	0.277963
	0.0775661	0.489606	0.285954	0.435314					0.19464	0.304125	0.144635	0.45535
	0.304504	0.542698	0.494753	0.428029					0.281771	0.36458	0.398087	0.511237
	0.00858737	0.406032	0.296118	0.417623					0.225913	0.0663808	0.563823	0.156523
	0.325856	0.262929	0.376307	0.376498					0.181053	0.142543	0.457886	0.0938228
	0.378975	0.472217	0.33171	0.374226					0.256953	0.538763	0.179831	0.157412
	0.170587	0.37812	0.321464	0.427531					0.0429654	0.0377976	0.120055	0.10184
	0.516104	0.560158	0.627921	0.383335					0.796584	0.448683	0.627304	0.399176
	0.0779224	0.613051	0.167938	0.312078					0.447405	0.388601	0.356158	0.490057
	0.0805094	0.517566	0.154906	0.172842					0.539324	0.831342	0.444865	0.708304
	0.0504814	0.133269	0.174533	0.288496					0.021492	0.035692	0.0573364	0.189638
	0.0914878	0.161005	0.22969	0.268607					0.13299	0.0803131	0.23673	0.208886
									0.255198	0.352721	0.230866	0.363738

## Sheet: Figure 1U cond_activity_Stats
	Figure 1U, Figure 1 - figure supplement 4
	Kruskal-Wallis test																Post-hoc
	P value	<0.0001															Number of families	1
	Exact or approximate P value?	Approximate															Number of comparisons per family	66
	P value summary	****															Alpha	0.05
	Do the medians vary signif. (P < 0.05)?	Yes
	Number of groups	12															Dunn's multiple comparisons test	Mean rank diff.	Significant?	Summary	Adjusted P Value
	Kruskal-Wallis statistic	138.332															Frz_CS_Hab vs. Mov_CS_Hab	-341.864	Yes	****	<0.0001
																	Frz_CS_Hab vs. Frz_noCS_Hab	-72.3097	No	ns	>0.9999
	Data summary																Frz_CS_Hab vs. Mov_noCS_Hab	-383.903	Yes	****	<0.0001
	Number of treatments (columns)	12															Frz_CS_Hab vs. Frz_CS_Train	5.65365	No	ns	>0.9999
	Number of values (total)	2064															Frz_CS_Hab vs. Mov_CS_Train	-315.77	Yes	****	<0.0001
																	Frz_CS_Hab vs. Frz_noCS_Train	-26.1592	No	ns	>0.9999
																	Frz_CS_Hab vs. Mov_noCS_Train	-73.8402	No	ns	>0.9999
																	Frz_CS_Hab vs. Frz_CS_Ret	75.0888	No	ns	>0.9999
	Descriptive statistics	Frz_CS_Hab	Mov_CS_Hab	Frz_noCS_Hab	Mov_noCS_Hab	Frz_CS_Train	Mov_CS_Train	Frz_noCS_Train	Mov_noCS_Train	Frz_CS_Ret	Mov_CS_Ret	Frz_noCS_Ret	Mov_noCS_Ret				Frz_CS_Hab vs. Mov_CS_Ret	-258.134	Yes	**	0.0031
	Number of values	176	176	176	176	163	163	163	163	177	177	177	177				Frz_CS_Hab vs. Frz_noCS_Ret	-65.6315	No	ns	>0.9999
																	Frz_CS_Hab vs. Mov_noCS_Ret	-297.428	Yes	***	0.0002
	Minimum	0	0.0207275	0	0.0282752	0	0	0.0060673	0.0175693	0	0.00222578	0.0201956	0.0582744				Mov_CS_Hab vs. Frz_noCS_Hab	269.554	Yes	**	0.0015
	25% Percentile	0.0780031	0.189158	0.105534	0.218667	0.0890736	0.166899	0.114502	0.149173	0.0821466	0.128355	0.114979	0.202297				Mov_CS_Hab vs. Mov_noCS_Hab	-42.0398	No	ns	>0.9999
	Median	0.170348	0.308523	0.208873	0.33281	0.185939	0.304531	0.205676	0.226927	0.173835	0.304125	0.225485	0.279002				Mov_CS_Hab vs. Frz_CS_Train	347.517	Yes	****	<0.0001
	75% Percentile	0.378564	0.490321	0.400517	0.437907	0.332368	0.539442	0.334066	0.348576	0.286093	0.518362	0.360119	0.429003				Mov_CS_Hab vs. Mov_CS_Train	26.094	No	ns	>0.9999
	Maximum	3.28689	1.48286	1.08742	1.31656	1.20361	0.992434	0.780318	0.693027	1.11388	2.15474	0.944607	1.00255				Mov_CS_Hab vs. Frz_noCS_Train	315.704	Yes	****	<0.0001
																	Mov_CS_Hab vs. Mov_noCS_Train	268.023	Yes	**	0.0023
	Mean	0.283201	0.351395	0.2766	0.350579	0.253267	0.363067	0.243152	0.248179	0.232369	0.392373	0.257054	0.317055				Mov_CS_Hab vs. Frz_CS_Ret	416.952	Yes	****	<0.0001
	Std. Deviation	0.346787	0.211159	0.223	0.180095	0.221238	0.243881	0.164589	0.142075	0.213954	0.360737	0.17438	0.160393				Mov_CS_Hab vs. Mov_CS_Ret	83.7293	No	ns	>0.9999
	Std. Error of Mean	0.0261401	0.0159167	0.0168092	0.0135752	0.0173287	0.0191023	0.0128916	0.0111282	0.0160818	0.0271146	0.0131072	0.0120559				Mov_CS_Hab vs. Frz_noCS_Ret	276.232	Yes	***	0.0009
																	Mov_CS_Hab vs. Mov_noCS_Ret	44.4355	No	ns	>0.9999
	Lower 95% CI	0.231611	0.319982	0.243425	0.323787	0.219048	0.325346	0.217695	0.226204	0.200631	0.338862	0.231186	0.293262				Frz_noCS_Hab vs. Mov_noCS_Hab	-311.594	Yes	****	<0.0001
	Upper 95% CI	0.334792	0.382809	0.309775	0.377371	0.287486	0.400789	0.26861	0.270154	0.264107	0.445885	0.282921	0.340847				Frz_noCS_Hab vs. Frz_CS_Train	77.9633	No	ns	>0.9999
																	Frz_noCS_Hab vs. Mov_CS_Train	-243.46	Yes	*	0.0113
	Mean ranks	885.227	1227.09	957.537	1269.13	879.574	1201	911.386	959.067	810.138	1143.36	950.859	1182.65				Frz_noCS_Hab vs. Frz_noCS_Train	46.1504	No	ns	>0.9999
																	Frz_noCS_Hab vs. Mov_noCS_Train	-1.53055	No	ns	>0.9999
																	Frz_noCS_Hab vs. Frz_CS_Ret	147.399	No	ns	>0.9999
																	Frz_noCS_Hab vs. Mov_CS_Ret	-185.825	No	ns	0.2244
	Shapiro-Wilk test	Frz_CS_Hab	Mov_CS_Hab	Frz_noCS_Hab	Mov_noCS_Hab	Frz_CS_Train	Mov_CS_Train	Frz_noCS_Train	Mov_noCS_Train	Frz_CS_Ret	Mov_CS_Ret	Frz_noCS_Ret	Mov_noCS_Ret				Frz_noCS_Hab vs. Frz_noCS_Ret	6.67818	No	ns	>0.9999
	W	0.6425	0.9195	0.895	0.9314	0.851	0.9388	0.925	0.9546	0.8377	0.8437	0.9277	0.9245				Frz_noCS_Hab vs. Mov_noCS_Ret	-225.118	Yes	*	0.0256
	P value	<0.0001	<0.0001	<0.0001	<0.0001	<0.0001	<0.0001	<0.0001	<0.0001	<0.0001	<0.0001	<0.0001	<0.0001				Mov_noCS_Hab vs. Frz_CS_Train	389.557	Yes	****	<0.0001
	Passed normality test (alpha=0.05)?	No	No	No	No	No	No	No	No	No	No	No	No				Mov_noCS_Hab vs. Mov_CS_Train	68.1338	No	ns	>0.9999
	P value summary	****	****	****	****	****	****	****	****	****	****	****	****				Mov_noCS_Hab vs. Frz_noCS_Train	357.744	Yes	****	<0.0001
																	Mov_noCS_Hab vs. Mov_noCS_Train	310.063	Yes	***	0.0001
																	Mov_noCS_Hab vs. Frz_CS_Ret	458.992	Yes	****	<0.0001
																	Mov_noCS_Hab vs. Mov_CS_Ret	125.769	No	ns	>0.9999
																	Mov_noCS_Hab vs. Frz_noCS_Ret	318.272	Yes	****	<0.0001
																	Mov_noCS_Hab vs. Mov_noCS_Ret	86.4753	No	ns	>0.9999
																	Frz_CS_Train vs. Mov_CS_Train	-321.423	Yes	****	<0.0001
																	Frz_CS_Train vs. Frz_noCS_Train	-31.8129	No	ns	>0.9999
																	Frz_CS_Train vs. Mov_noCS_Train	-79.4939	No	ns	>0.9999
																	Frz_CS_Train vs. Frz_CS_Ret	69.4352	No	ns	>0.9999
																	Frz_CS_Train vs. Mov_CS_Ret	-263.788	Yes	**	0.003
																	Frz_CS_Train vs. Frz_noCS_Ret	-71.2851	No	ns	>0.9999
																	Frz_CS_Train vs. Mov_noCS_Ret	-303.082	Yes	***	0.0002
																	Mov_CS_Train vs. Frz_noCS_Train	289.61	Yes	***	0.0008
																	Mov_CS_Train vs. Mov_noCS_Train	241.929	Yes	*	0.0163
																	Mov_CS_Train vs. Frz_CS_Ret	390.858	Yes	****	<0.0001
																	Mov_CS_Train vs. Mov_CS_Ret	57.6354	No	ns	>0.9999
																	Mov_CS_Train vs. Frz_noCS_Ret	250.138	Yes	**	0.0073
																	Mov_CS_Train vs. Mov_noCS_Ret	18.3416	No	ns	>0.9999
																	Frz_noCS_Train vs. Mov_noCS_Train	-47.681	No	ns	>0.9999
																	Frz_noCS_Train vs. Frz_CS_Ret	101.248	No	ns	>0.9999
																	Frz_noCS_Train vs. Mov_CS_Ret	-231.975	Yes	*	0.0222
																	Frz_noCS_Train vs. Frz_noCS_Ret	-39.4723	No	ns	>0.9999
																	Frz_noCS_Train vs. Mov_noCS_Ret	-271.269	Yes	**	0.0018
																	Mov_noCS_Train vs. Frz_CS_Ret	148.929	No	ns	>0.9999
																	Mov_noCS_Train vs. Mov_CS_Ret	-184.294	No	ns	0.2898
																	Mov_noCS_Train vs. Frz_noCS_Ret	8.20873	No	ns	>0.9999
																	Mov_noCS_Train vs. Mov_noCS_Ret	-223.588	Yes	*	0.0362
																	Frz_CS_Ret vs. Mov_CS_Ret	-333.223	Yes	****	<0.0001
																	Frz_CS_Ret vs. Frz_noCS_Ret	-140.72	No	ns	>0.9999
																	Frz_CS_Ret vs. Mov_noCS_Ret	-372.517	Yes	****	<0.0001
																	Mov_CS_Ret vs. Frz_noCS_Ret	192.503	No	ns	0.1568
																	Mov_CS_Ret vs. Mov_noCS_Ret	-39.2938	No	ns	>0.9999
																	Frz_noCS_Ret vs. Mov_noCS_Ret	-231.797	Yes	*	0.0167
																	Test details	Mean rank 1	Mean rank 2	Mean rank diff.	n1	n2	Z
																	Frz_CS_Hab vs. Mov_CS_Hab	885.227	1227.09	-341.864	176	176	5.38109
																	Frz_CS_Hab vs. Frz_noCS_Hab	885.227	957.537	-72.3097	176	176	1.13819
																	Frz_CS_Hab vs. Mov_noCS_Hab	885.227	1269.13	-383.903	176	176	6.04281
																	Frz_CS_Hab vs. Frz_CS_Train	885.227	879.574	5.65365	176	163	0.087268
																	Frz_CS_Hab vs. Mov_CS_Train	885.227	1201	-315.77	176	163	4.87412
																	Frz_CS_Hab vs. Frz_noCS_Train	885.227	911.386	-26.1592	176	163	0.403786
																	Frz_CS_Hab vs. Mov_noCS_Train	885.227	959.067	-73.8402	176	163	1.13977
																	Frz_CS_Hab vs. Frz_CS_Ret	885.227	810.138	75.0888	176	177	1.18361
																	Frz_CS_Hab vs. Mov_CS_Ret	885.227	1143.36	-258.134	176	177	4.0689
																	Frz_CS_Hab vs. Frz_noCS_Ret	885.227	950.859	-65.6315	176	177	1.03453
																	Frz_CS_Hab vs. Mov_noCS_Ret	885.227	1182.65	-297.428	176	177	4.68828
																	Mov_CS_Hab vs. Frz_noCS_Hab	1227.09	957.537	269.554	176	176	4.2429
																	Mov_CS_Hab vs. Mov_noCS_Hab	1227.09	1269.13	-42.0398	176	176	0.661725
																	Mov_CS_Hab vs. Frz_CS_Train	1227.09	879.574	347.517	176	163	5.36417
																	Mov_CS_Hab vs. Mov_CS_Train	1227.09	1201	26.094	176	163	0.402778
																	Mov_CS_Hab vs. Frz_noCS_Train	1227.09	911.386	315.704	176	163	4.87312
																	Mov_CS_Hab vs. Mov_noCS_Train	1227.09	959.067	268.023	176	163	4.13713
																	Mov_CS_Hab vs. Frz_CS_Ret	1227.09	810.138	416.952	176	177	6.57231
																	Mov_CS_Hab vs. Mov_CS_Ret	1227.09	1143.36	83.7293	176	177	1.3198
																	Mov_CS_Hab vs. Frz_noCS_Ret	1227.09	950.859	276.232	176	177	4.35417
																	Mov_CS_Hab vs. Mov_noCS_Ret	1227.09	1182.65	44.4355	176	177	0.700425
																	Frz_noCS_Hab vs. Mov_noCS_Hab	957.537	1269.13	-311.594	176	176	4.90463
																	Frz_noCS_Hab vs. Frz_CS_Train	957.537	879.574	77.9633	176	163	1.20342
																	Frz_noCS_Hab vs. Mov_CS_Train	957.537	1201	-243.46	176	163	3.75797
																	Frz_noCS_Hab vs. Frz_noCS_Train	957.537	911.386	46.1504	176	163	0.712364
																	Frz_noCS_Hab vs. Mov_noCS_Train	957.537	959.067	-1.53055	176	163	0.0236251
																	Frz_noCS_Hab vs. Frz_CS_Ret	957.537	810.138	147.399	176	177	2.3234
																	Frz_noCS_Hab vs. Mov_CS_Ret	957.537	1143.36	-185.825	176	177	2.9291
																	Frz_noCS_Hab vs. Frz_noCS_Ret	957.537	950.859	6.67818	176	177	0.105266
																	Frz_noCS_Hab vs. Mov_noCS_Ret	957.537	1182.65	-225.118	176	177	3.54848
																	Mov_noCS_Hab vs. Frz_CS_Train	1269.13	879.574	389.557	176	163	6.01308
																	Mov_noCS_Hab vs. Mov_CS_Train	1269.13	1201	68.1338	176	163	1.05169
																	Mov_noCS_Hab vs. Frz_noCS_Train	1269.13	911.386	357.744	176	163	5.52203
																	Mov_noCS_Hab vs. Mov_noCS_Train	1269.13	959.067	310.063	176	163	4.78604
																	Mov_noCS_Hab vs. Frz_CS_Ret	1269.13	810.138	458.992	176	177	7.23497
																	Mov_noCS_Hab vs. Mov_CS_Ret	1269.13	1143.36	125.769	176	177	1.98246
																	Mov_noCS_Hab vs. Frz_noCS_Ret	1269.13	950.859	318.272	176	177	5.01683
																	Mov_noCS_Hab vs. Mov_noCS_Ret	1269.13	1182.65	86.4753	176	177	1.36309
																	Frz_CS_Train vs. Mov_CS_Train	879.574	1201	-321.423	163	163	4.86891
																	Frz_CS_Train vs. Frz_noCS_Train	879.574	911.386	-31.8129	163	163	0.481901
																	Frz_CS_Train vs. Mov_noCS_Train	879.574	959.067	-79.4939	163	163	1.20417
																	Frz_CS_Train vs. Frz_CS_Ret	879.574	810.138	69.4352	163	177	1.07324
																	Frz_CS_Train vs. Mov_CS_Ret	879.574	1143.36	-263.788	163	177	4.07729
																	Frz_CS_Train vs. Frz_noCS_Ret	879.574	950.859	-71.2851	163	177	1.10183
																	Frz_CS_Train vs. Mov_noCS_Ret	879.574	1182.65	-303.082	163	177	4.68464
																	Mov_CS_Train vs. Frz_noCS_Train	1201	911.386	289.61	163	163	4.38701
																	Mov_CS_Train vs. Mov_noCS_Train	1201	959.067	241.929	163	163	3.66474
																	Mov_CS_Train vs. Frz_CS_Ret	1201	810.138	390.858	163	177	6.04138
																	Mov_CS_Train vs. Mov_CS_Ret	1201	1143.36	57.6354	163	177	0.890852
																	Mov_CS_Train vs. Frz_noCS_Ret	1201	950.859	250.138	163	177	3.86631
																	Mov_CS_Train vs. Mov_noCS_Ret	1201	1182.65	18.3416	163	177	0.2835
																	Frz_noCS_Train vs. Mov_noCS_Train	911.386	959.067	-47.681	163	163	0.72227
																	Frz_noCS_Train vs. Frz_CS_Ret	911.386	810.138	101.248	163	177	1.56496
																	Frz_noCS_Train vs. Mov_CS_Ret	911.386	1143.36	-231.975	163	177	3.58557
																	Frz_noCS_Train vs. Frz_noCS_Ret	911.386	950.859	-39.4723	163	177	0.610111
																	Frz_noCS_Train vs. Mov_noCS_Ret	911.386	1182.65	-271.269	163	177	4.19292
																	Mov_noCS_Train vs. Frz_CS_Ret	959.067	810.138	148.929	163	177	2.30195
																	Mov_noCS_Train vs. Mov_CS_Ret	959.067	1143.36	-184.294	163	177	2.84858
																	Mov_noCS_Train vs. Frz_noCS_Ret	959.067	950.859	8.20873	163	177	0.12688
																	Mov_noCS_Train vs. Mov_noCS_Ret	959.067	1182.65	-223.588	163	177	3.45593
																	Frz_CS_Ret vs. Mov_CS_Ret	810.138	1143.36	-333.223	177	177	5.25996
																	Frz_CS_Ret vs. Frz_noCS_Ret	810.138	950.859	-140.72	177	177	2.22128
																	Frz_CS_Ret vs. Mov_noCS_Ret	810.138	1182.65	-372.517	177	177	5.88022
																	Mov_CS_Ret vs. Frz_noCS_Ret	1143.36	950.859	192.503	177	177	3.03868
																	Mov_CS_Ret vs. Mov_noCS_Ret	1143.36	1182.65	-39.2938	177	177	0.620256
																	Frz_noCS_Ret vs. Mov_noCS_Ret	950.859	1182.65	-231.797	177	177	3.65893
