# Supplementary material for: A striatal circuit balances learned fear in the presence and absence of sensory cues
Source: eLife. 2023 Jan 19;12:e75703. doi: 10.7554/eLife.75703 (PMC9897731; doi:10.7554/eLife.75703)
Supplement: Figure 3—source data 1. [file elife-75703-fig3-data1.xlsx]

## Sheet: Figure 3I tone_Data
	Figure 3I
		Resp	nonResp
	Hab	13	160
	Train	14	187
	Ret	17	143

## Sheet: Figure 3I tone_Stats
	Figure 3I
	Test	Chi-square test
	Chi-square, df	1.022, 1
	P value	0.312
	P value summary	ns
	One- or two-sided	NA
	Statistically significant (P < 0.05)?	No
	Data analyzed
	Number of rows	3
	Number of columns	2

## Sheet: Figure 3P mov_Data
	Figure 3P
	during CS
		Resp	nonResp
	Hab	43	130
	Train	55	146
	Ret	46	114
	outside CS
		Resp	nonResp
	Hab	27	146
	Train	18	183
	Ret	11	149

## Sheet: Figure 3P mov_Stats
	Figure 3P
	during CS
	Test	Chi-square test
	Chi-square, df	0.6659, 2
	P value	0.7168
	P value summary	ns
	One- or two-sided	NA
	Statistically significant (P < 0.05)?	No
	Data analyzed
	Number of rows	3
	Number of columns	2
	outside CS
	Test	Chi-square test
	Chi-square, df	7.557, 2
	P value	0.0229
	P value summary	*
	One- or two-sided	NA
	Statistically significant (P < 0.05)?	Yes
	Data analyzed
	Number of rows	3
	Number of columns	2

## Sheet: Figure 3R cond_activity_Data
	Figure 3R, Figure 3 - figure supplement 4
	Frz_CS_Hab	Mov_CS_Hab	Frz_noCS_Hab	Mov_noCS_Hab	Frz_CS_Train	Mov_CS_Train	Frz_noCS_Train	Mov_noCS_Train	Frz_CS_Ret	Mov_CS_Ret	Frz_noCS_Ret	Mov_noCS_Ret
	0.311496	0.553831	0.412239	0.481783	0.107453	1.06738	0.206416	1.24909	0.119805	2.38034	0.266658	1.45872
	0.300265	0.534179	0.150875	0.584827	0.209465	0.349734	0.432712	0.3764	0.442066	0.110256	0.564815	0.0413697
	0.0777848	0.793488	0.12683	0.483301	0.123578	0.313862	0.107897	0.594239	0.303621	1.32769	0.223258	0.365496
	0.124224	0.184568	0.123425	0.275448	0.161876	0.67292	0.0633556	0.58265	0.602496	0.304151	0.219709	0.280564
	0.206598	0.773702	0.0476327	0.698287	0.545256	0.0658088	0.108538	0.0484174	0.306567	1.08225	0.223181	0.225405
	0.252163	0.389521	0.222672	0.331022	0.587834	0.526604	0.320235	0.408838	0.439364	2.13454	0.409473	1.19267
	0.490942	0.284934	0.421229	0.47607	0.184265	0.696604	0.245873	0.383077	0.634454	0.295366	0.378259	0.227207
	0.0623004	0.161608	0.0909059	0.475698	0.0973174	0.354204	0.0819484	0.309575	0.689991	0.019722	0.934036	0.228125
	0.0782095	0.467701	0.153955	0.482185	0.750904	0.327877	0.515619	0.506833	0.331093	1.28467	0.67592	0.583972
	0.0747541	0.367482	0.134124	0.424655	0.282565	1.04905	0.326115	0.86154	0.124387	0.660991	0.235698	0.456525
	0.114739	0.348197	0.0942522	0.304433	0.163531	0.497705	0.126214	0.486582	0.701936	0.893863	0.440398	0.151476
	0.302295	0.102525	0.128894	0.286628	0.0869244	0.370012	0.108172	0.271681	0.250295	1.33094	0.195594	0.72569
	0.117162	0.785384	0.0874341	0.350763	0.0854729	0.0822229	0.132958	0.10335	0.168616	0.00464667	0.0160016	0.00554758
	0.389174	0.5137	0.222696	0.392976	0.235019	0.186808	0.253539	0.199534	0.371799	0.0879162	0.227564	0.210279
	0.32922	0.538845	0.444053	0.622278	0.672227	0.527399	0.214411	0.458713	1.35375	0.124669	0.899687	0.0523846
	0.205576	0.467919	0.385237	0.732279	2.17028	0.689899	1.14536	0.377089	0.662222	2.59922	0.46079	0.33446
	0.0847737	0.247158	0.213392	0.361442	0.286913	0.263175	0.247903	0.19035	0.54732	1.91229	0.237814	0.637737
	0.317622	0.44687	0.370186	0.534345	0.173109	0.269985	0.17424	0.315825	0.944644	0.190114	0.433873	0.29247
	0.141832	0.554217	0.168625	0.6136	0.412339	0.330859	0.127135	0.264314	0.498821	2.36865	0.448732	0.957683
	2.78965	0.505408	1.07683	0.215296	0.10603	1.19661	0.112114	1.05955	0.965466	0.705362	0.793093	0.481775
	0.207256	0.523015	0.208062	0.387357	0.480865	1.1887	0.253835	0.764488	0.211529	1.8718	0.206205	0.597749
	0.182804	0.537419	0.219333	0.681941	0.133159	0.510582	0.159928	0.595655	0.347924	1.32409	0.380665	0.743563
	0.540642	0.616127	0.154936	0.607986	0.386811	0.854133	0.275581	0.558264	0.387496	1.33999	0.293568	0.409968
	0.357216	0.387581	0.236365	0.41833	0.414104	0.207154	0.380448	0.42762	0.403491	0.83522	0.220215	0.290873
	0.125194	0.496283	0.115882	0.257398	0.681404	0.92462	0.434863	0.59348	0.570178	0.258732	0.301304	0.166456
	0.183293	0.524376	0.160843	0.488311	0.219657	0.451031	0.127469	0.145235	0.204451	0.555648	0.210094	0.301225
	0.110637	0.561411	0.199501	0.57602	1.05787	0.583886	0.531417	0.307181	0.701157	1.85811	0.304586	0.750802
	0.158809	1.12876	0.0378993	1.01388	0.203167	0.715437	0.13196	0.300876	0.09705	0.0320196	0.166507	0.16809
	0.228624	0.269111	0.414026	0.286082	0.172749	0.786921	0.177808	0.592212	0.323861	0.0350632	0.0622753	0.0350193
	0.197031	0.226863	0.262248	0.209214	0.404718	0.261739	0.311768	0.289557	0.27532	1.19026	0.191754	0.294392
	0.0315297	0.556873	0.0958056	0.507334	0.254316	0.0604065	0.23492	0.0865089	0.674972	0.419736	0.489774	0.324239
	0.205623	0.640734	0.126437	0.458347	0.26411	0.0964377	0.237956	0.138127	0.402453	0.582712	0.182457	0.677426
	0.266673	0.680678	0.243655	0.366207	0.840352	0.613501	0.0948296	0.39099	0.97715	0.999066	0.399396	0.786082
	0.203524	0.154992	0.514395	0.285318	0.357814	0.596481	0.0930953	0.552675	0.302354	0.40974	0.0949685	0.633816
	0.202764	0.153319	0.174034	0.199456	0.109098	0.847351	0.340843	0.737007	0.353956	1.24022	0.323603	0.756947
	0.304779	0.201066	0.245872	0.162966	0.139483	0.212961	0.0650281	0.0915601	0.110893	1.14719	0.391677	0.949325
	0.0498172	0.0160805	0.0651981	0.0510038	0.523873	0.156515	0.34441	0.0912353	0.0662102	2.04876	0.0938653	0.531867
	0.387121	0.375579	0.608376	0.370068	0.510138	0.434695	0.226244	0.454034	0.0906032	1.77635	0.108646	0.722382
	0.279236	0.437444	0.226667	0.388997	0.399028	0.823244	0.111386	0.559797	0.637976	0.743425	0.278226	0.876899
	0.156799	0.119023	0.147161	0.124864	0.288031	0.608376	0.115206	0.322292	0.168392	0.231004	0.200053	0.297215
	0.0733188	0.512454	0.586859	0.530667	0.325886	0.830657	0.10487	0.839759	0.0919752	0.200371	0.111711	0.346341
	0.321619	0.33806	0.148892	0.445902	0.194825	0.448342	0.0921829	0.502265	0.885918	0.233973	0.469737	0.112942
	0.00479291	0.467794	0.114876	0.394192	0.255076	1.04668	0.209341	1.05933	0.093118	0.0246505	0.196003	0.285086
	0.154831	0.328862	0.197985	0.337999	0.212942	0.686554	0.218438	0.655909	0.0256441	0.0466085	0.182931	0.140272
	0.0598871	0.297234	0.25837	0.373988	0.49611	0.141164	0.272011	0.125331	0.134353	0.0330444	0.225396	0.25132
	0.217646	0.883786	0.21219	0.586021	0.163048	0.235737	0.190453	0.342796	0.165425	0.0634925	0.275963	0.104236
	0.472935	0.67673	0.425198	0.665421	0.173948	0.277922	0.252745	0.243611	0.950699	1.07988	0.275562	0.596486
	0.512985	1.17291	0.770175	1.09209	0.0996257	0.328933	0.180506	0.32033	0.181989	0.235976	0.0840831	0.196033
	0.327372	0.710549	0.203474	0.573485	0.417578	0.866866	0.350756	0.55829	0.293697	1.28401	0.233194	0.788634
	0.207542	0.35229	0.238997	0.32718	0.340328	0.436315	0.473468	0.244061	0.0903158	0.564913	0.161278	0.653429
	0.0677061	0.57312	0.398038	0.261346	0.159518	0.626604	0.0739078	0.254149	0.184581	0.131082	0.13944	0.368716
	0.0359802	0.252486	0.227834	0.208073	0.318268	0.136185	0.245653	0.130477	0.58404	0.945771	0.43743	0.792454
	0.064053	0.235151	0.106612	0.141887	0.301631	0.338297	0.309148	0.497532	0.161937	0.0982497	0.357869	0.208336
	0.30136	0.187983	0.380955	0.325332	0.749117	0.299011	0.528368	0.22661	0.121223	0.114855	0.296479	0.321317
	0.125033	0.152788	0.212841	0.282173	0.418013	0.546584	0.336681	0.400178	0.382817	0.102075	0.203247	0.349284
	0.137715	0.114968	0.154583	0.127265	0.299561	0.466842	0.293221	0.304039	0.101295	0.103073	0.168316	0.496601
	0.175323	0.200409	0.184546	0.290258	0.141473	0.617197	0.104764	0.481858	0.519105	0.387032	0.377309	0.443005
	1.01348	0.2194	0.217941	0.297623	0.107499	0.405415	0.0611426	0.44359	0.147856	0.490619	0.370219	0.593523
	0.357229	0.221947	0.0431645	0.193257	0.38422	0.553072	0.349391	0.368892	0.34015	0.0524859	0.409132	0.044003
	0.455989	0.252867	0.499387	0.386026	0.14008	0.395052	0.141283	0.303194	0.126085	0	0.159857	0.0750197
	0.0932565	0.120409	0.183516	0.159492	0.359749	0.749845	0.285806	0.508995	0.0556494	0.0335368	0.0901624	0.0298571
	0	0.0734894	0.240926	0.216192	0.272506	0.39133	0.148535	0.252485	0	0	0.199874	2.92915e-09
	0.156651	0.241145	0.177034	0.410422	0.319516	0.6622	0.287865	0.445094	0.24028	0.0784128	0.225741	0.0784079
	0.14587	0.198333	0.127738	0.291975	0.120969	0.534648	0.177776	0.30398	0.0649781	0	0.195316	0.066772
	0.229911	0.224392	0.274754	0.328862	0.0866376	0.150881	0.123411	0.192135	0.143639	0.126851	0.329896	0.241896
	0.188927	0.204861	0.128723	0.193063	0.254738	0.251397	0.0806324	0.192656	0.0698009	0.167125	0.0711855	0.522214
	0.146231	0.0794741	0.199394	0.17537	0.949158	0.999627	0.394629	0.693589	0.490156	0.284352	0.510253	0.542942
	0	0.100061	0.126797	0.227044	0.832043	0.700949	0.277404	0.432207	0.296204	1.23706	0.261522	1.46751
	0.0928342	0.65975	0.266147	0.598017	0.433651	0.0737461	0.380445	0.139914	0.147717	0.576644	0.210688	0.797945
	0.0749805	0.591027	0.126892	0.33823	0.440121	0.257256	0.0729403	0.0401782	0.716965	0.438934	0.661646	0.402956
	2.07288	0.317908	0.189739	0.277744	0.347352	0.299954	0.261923	0.230084	0.245731	0.563677	0.312813	0.608714
	0.219721	0.405228	0.360165	0.407163	0.421075	0.377036	0.131571	0.163987	0.0491815	0.546898	0.0547924	0.866769
	0.219211	0.614376	0.256991	0.509236	0.252605	0.19408	0.0657724	0.0332228	0.49993	0.477191	0.677371	0.696764
	0.749464	0.5399	1.25115	0.577033	0.0773922	0.0372874	0.105355	0.168394	0.0917979	0.171768	0.279141	0.211728
	0.63829	0.295404	2.88716	0.343795	0.384424	0.267508	0.0524839	0.013133	0.182148	0.556367	0.372631	0.503484
	0.160066	0.470719	0.0841253	0.611291	0.0417007	0.129487	0.116248	0.188442	0.485701	0.237799	0.282214	0.675747
	0.0580204	0.505713	0.43404	0.341274	0.149151	0.0386026	0.206754	0.16771	0.0544487	0.44621	0.029534	0.623547
	0.00504752	0.147059	0.196772	0.147893	0.500944	0.149977	0.243916	0.270509	0.146576	0.125967	0.50067	0.149486
	0.134787	0.438228	0	0.228223	0.335135	0.102133	0.336288	0.25283	0.139423	0.738819	0.356904	1.19538
	0.108401	0.578813	0.0254798	0.389604	0.290395	0.237487	0.213934	0.227186	0.131998	0.0849031	0.395339	0.0183102
	0	0.290989	0	0.305279	0.32791	0.263484	0.332355	0.299213	0.314015	0.0304419	0.419784	0.304593
	0.381958	0.645787	2.09386	0.766557	0.0359044	0.00366562	0.222181	0.0583396	0.467673	1.48023	0.336486	0.804361
	0.273611	0.232655	0.548378	0.376035	0.199834	0.316326	0.253133	0.245795	0.12531	0.10644	0.456482	0.180656
	6.35738	0.432398	0.434157	0.516755	0.137138	0.182761	0.13808	0.0710788	0.086342	1.35467	0.266901	1.12336
	0.129403	0.825242	0.151505	0.747819	0.126731	0.240817	0.172874	0.114778	0.318406	0.703934	0.459381	0.93208
	2.97126	0.349956	1.40748	0.403878	0.145765	0.278256	0.146616	0.150948	0.352713	0.287701	0.515046	0.608175
	0.387935	0.374172	0.012798	0.275443	0.148871	0.834395	0.102681	0.844984	0.0911833	0.246394	0.431038	0.577926
	0.320596	0.350877	0.24907	0.239767	0.467675	0.487173	0.398258	0.461366	0.169463	0.477916	0.185489	0.831697
	2.54935	0.327104	0.412714	0.301446	0.323205	0.854494	0.334329	0.788845	0.681393	0.0739876	0.713769	0.150943
	1.33961	0.628644	0.630227	0.609763	0.161494	0.405836	0.275995	0.310268	0.51531	0.431491	0.937209	0.400823
	0.0957128	0.393442	0	0.554743	0.291339	1.0907	0.260893	0.638358	0.584734	1.09209	0.663677	0.954842
	0.0726126	0.478608	0.315284	0.489125	0.533724	0.328274	0.680387	0.521882	0.208371	0.367241	0.240891	0.541871
	0.0334227	0.502717	0.327499	0.518787	0.319757	0.545348	0.26209	0.66424	0.708136	0.7927	0.464524	0.704036
	0.789194	0.480666	0.487429	0.654809	0.0629904	0.793293	0.0351664	0.758753	0.0977493	0.167859	0.34509	0.41983
	0.331817	0.702619	0.256229	0.849618	0.395945	0.592176	0.385547	0.594418	0.143136	1.02325	0.218588	0.759859
	0.15277	0.55918	0.561922	0.460895	0.143312	0.271174	0.563345	0.254041	0.622678	0.753745	0.500182	0.729454
	0.421457	0.618703	0.0607903	0.60687	0.261387	0.253485	0.277252	0.454519	0.206717	0.385956	0.358958	0.982301
	0.0162662	0.375553	0.0821402	0.28923	0.272654	0.50168	0.238855	0.480316	0.0424297	0.0362327	0.118641	0.523883
	0.784188	0.560869	0.234349	0.597425	0.290454	0.586844	0.249142	0.537442	0.0543199	0.69791	0.0799952	0.795108
	1.2944	0.543528	0.302049	0.461685	0.0401741	0.32618	0.0346828	0.341414	0.150569	0.199983	0.345806	0.192774
	0.0531717	0.372291	0.1345	0.307879	0.366585	0.255426	0.486314	0.334375	0.126094	0.22266	0.194266	0.425045
	1.9311	0.7916	0.812667	0.812041	0.322947	0.308777	0.271111	0.364921	0.0403164	0.156863	0.134837	0.514929
	0.236069	0.673517	1.0352	0.648032	0.192833	0.24607	0.286104	0.345269	0.279818	0.198072	0.658982	0.241403
	0.102261	0.557056	0	0.434352	0.0976892	0.00215962	0.282721	0.0625428	0.154932	0.289132	0.137291	0.360392
	3.78839	0.787636	0.303753	0.437375	0.227495	0.437125	0.376276	0.375531	0.0796882	0.556262	0.147304	0.640311
	0.027242	0.296523	0.444621	0.426304	0.456261	0.361045	0.560229	0.589977	0.215112	0.0355682	0.30558	0.359046
	0.0676776	0.414034	0	0.604063	0.177961	0.229228	0.116093	0.155247	0.242817	0.502702	0.12736	0.562165
	0.0389295	0.807134	0.163527	0.710099	0.182908	0.220413	0.164039	0.338547	0.638224	0.785536	0.217648	0.418983
	0.0476794	0.297068	0.786308	0.317267	0.323845	0.486992	0.310041	0.368106	0.183501	0.551513	0.149569	0.51081
	0.041432	0.240396	2.73652	0.281051	0.159824	0.188377	0.177306	0.475967	0.579955	0.0772072	0.494364	0.283405
	0.696324	0.743556	0.251448	0.826716	0.248058	0.524676	0.240764	0.790377	0.286776	0.677777	0.124349	0.440792
	1.64836	0.428954	0.24027	0.422975	0.987816	0.585134	0.919613	0.62879	0.145725	0.0451409	0.226946	0.146561
	0.0565267	0.504111	0.11675	0.273554	0.583025	1.03217	0.302903	0.862065	0.0732554	0	0.141758	0.0771473
	0.0318196	0.682673	0.208085	0.605064	0.380519	0.720761	0.216373	0.749185	0.0761329	0.0430001	0.235763	0.0807442
	0.0081348	0.734319	0.0128487	0.484506	0.448015	0.324222	0.281139	0.239832	0.172253	0.621625	0.213467	0.40709
	0.209833	0.254624	0.201563	0.288184	0.323845	0.519445	0.264458	0.465531	0.078834	0.300463	0.165918	0.482655
	0.033297	0.193545	0.0119619	0.261566	0.230971	0.299332	0.266182	0.266886	0.0897381	0.140477	0.137074	0.278414
	0.431944	0.14198	0.0236305	0.148718	0.881566	0.40395	0.651214	0.26717	0.210362	0.169141	0.321893	0.394033
	0.939373	0.560383	1.74442	0.399112	0.7558	0.560381	0.662232	0.687104	0.0151523	0.0989077	0.0988518	0.427374
	0.858721	0.597987	0.617878	0.299078	0.522488	1.33612	0.444642	1.14942	0.227818	0.272367	0.275662	0.42493
	0.233941	0.151791	0.812464	0.387869	0.275799	0.238906	0.21656	0.402834	0.1683	1.27589	0.231044	1.17977
	0.590145	0.521548	0.143285	0.371761	0.238912	0.381961	0.266277	0.545002	0.342439	0.0680346	0.10132	0.0612412
	0.126273	0.266007	0.0619476	0.120684	0.35958	0.487614	0.367213	0.672461	0.443047	0.454942	0.420778	0.205432
	0.45908	0.347996	0.395434	0.407228	0.175839	0.268815	0.158533	0.368137	0.24635	0.274483	0.347003	0.221878
	0.120835	0.184452	0.413263	0.27144	0.561047	0.325051	0.791769	0.467756	0.116872	0.31669	0.285836	0.487748
	0.313631	0.312936	0.877103	0.326995	0.267307	0.275402	0.327119	0.506557	0.168627	0	0.221713	0.195863
	0.0651088	0.0864917	0.0193135	0.329417	0.237815	0.497758	0.24934	0.714715	0.183953	0.7045	0.293156	1.14338
	0.0661236	0.140121	0.274292	0.332227	0.182842	0.17692	0.209518	0.348563	0.283649	0.963723	0.419951	0.768568
	0.603967	0.528269	0.25329	0.373828	0.317448	0.401295	0.328738	0.351889	0.17937	0.616164	0.133758	0.592402
	0.812443	0.199599	0.15395	0.401311	0.182245	0.871204	0.109462	0.702613	0.691012	0.349793	0.445484	0.363642
	0.0230041	0.357136	0.219129	0.353914	0.255347	0.19849	0.845964	0.248778	0.200709	0.263259	0.326336	0.151933
	0.16042	0.256917	0.484289	0.3313	0.101589	0.259734	0.144785	0.225208	0.041331	0.520144	0.159781	0.722221
	0.306511	0.495742	0.792414	0.572957	0.564646	0.827377	0.477414	0.936754	0.403826	0.482001	0.537472	0.453217
	0.127434	0.556233	0.253293	0.629604	0.313991	0.334594	0.385916	0.432017	0.761315	0.375534	0.578531	0.39856
	0.0195647	0.213162	0.134227	0.189368	0.357533	0.447836	0.324503	0.444266	0.633849	1.44418	0.390963	0.798675
	0.0539239	0.519046	0.0472078	0.528919	0.501476	0.53051	0.372888	0.552008	0.0477201	0.902846	0.0885747	0.724607
	0.373814	0.666397	0.210511	0.515518	0.622928	0.282108	0.665302	0.386632	0.41932	0.907588	0.250218	0.897302
	0.0824467	0.844304	0.192632	0.756661	0.0911545	0.679678	0.0884205	0.423057	0.0772105	0.529287	0.0796141	0.656906
	0.0739855	0.275603	0.556096	0.226361	0.126308	0.172876	0.08179	0.255383	0.514021	0.865487	0.438371	0.618877
	0.134175	0.190218	0.187221	0.303241	0.0835625	0.15132	0.136081	0.264616	0.252519	0.457922	0.324884	0.340327
	0.120764	0.23159	0.765751	0.173645	0.131883	0.239136	0.105733	0.417575	0.222656	0.334279	0.245897	0.6391
	2.48683	0.293713	1.69943	0.10279	0.501622	0.471161	0.330365	0.356873	0.174663	0.263099	0.33071	0.129852
	0.174914	0.406921	0.142137	0.391856	0.0758523	0.0755767	0.132562	0.21025	0.838087	0.511242	0.968541	0.37103
	0.199067	0.374638	0.0307736	0.131378	0.190713	0.163319	0.19572	0.256565	0.238966	0.20379	0.229662	0.270883
	0.196995	0.550006	0.108893	0.696447	0.273602	0.521974	0.178969	0.424485	0.0367646	0.0160836	0.202373	0.191895
	0.305679	0.256206	0.135785	0.230125	0.367369	0.455882	0.0718091	0.365731	0.0134599	0.0750495	0.314998	0.2953
	0.165029	0.706488	0.544815	0.468046	0.230488	0.469593	0.203343	0.681255	0.245684	0.335572	0.378852	0.262717
	0	0.327454	0.583547	0.552655	0.0754471	0.272876	0.12266	0.269594	0.100371	0.0175681	0.122024	0.0923414
	0.254085	0.339703	0.240343	0.385179	0.150485	0.431457	0.333823	0.561274	0.764032	0.281191	0.840967	0.256909
	1.66266	0.320027	1.24369	0.183605	0.118784	0.389329	0.309784	0.526644	0.520343	0.34742	0.542129	0.458621
	0.484059	0.577229	0.423541	0.529194	0.0317144	0.0733509	0.111942	0.124118	0.115341	0.182717	0.247732	0.490859
	0.1033	0.512812	0.0019237	0.376332	0.228933	0.0698165	0.239895	0.159594	0.10936	0.255476	0.16525	0.463943
	0.257367	0.331736	0.189674	0.441177	0.11113	0.0586392	0.0854144	0.141104	0.486302	0.217602	0.452023	0.492928
	0.1927	0.607108	0.0917726	0.950075	0.212827	0.264238	0.135814	0.152322	0.0590536	0.0990549	0.087141	0.20495
	0.228928	0.410082	0.263753	0.466588	0.345181	0.673157	0.129081	0.406558	0.767134	0.6998	0.617569	0.832755
	0.108928	1.04031	0.188059	0.729491	0.276542	0.359004	0.35289	0.426603	0.546682	0.838084	0.390427	0.799362
	0.0615424	0.448005	0.117365	0.315755	0.219214	0.125009	0.190449	0.275591	0.0492373	1.12287	0.123325	0.652745
	0.47138	0.320227	0.310643	0.515289	0.260921	0.669971	0.278958	0.671617	0.775911	0.29424	0.646561	0.404305
	2.16564	0.360185	1.66128	0.13452	0.361191	0.886196	0.269324	0.576909	0.14841	0.162101	0.15766	0.301522
	0.228744	0.238962	0.104477	0.136273	0.114164	0.605425	0.102215	0.470147	0.508352	0.880321	0.315061	1.04105
	0.0973145	0.0480481	1.15978	0.107303	0.227644	0.745401	0.151909	0.392516
	0.89577	0.210548	0.676876	0.222618	0.0806029	0.237732	0.123449	0.193129
	1.04473	0.211184	1.12527	0.220631	0.145884	0.37643	0.103498	0.19436
	0.0342997	0.160846	0.0390127	0.24141	0.169376	0.083962	0.200876	0.130724
	0.146154	0.236516	0.289067	0.30158	0.224129	0.271243	0.28194	0.340454
	1.4807	0.613765	1.02932	0.538939	0.644832	0.253067	0.28771	0.120492
	0.0605385	0.651446	0.0709924	0.869829	1.14369	0.502006	0.812458	0.406907
	0.170465	0.525449	0.164891	0.467233	0.246078	0.363614	0.159111	0.457178
	0.252937	0.204004	0.435958	0.295486	0.14508	0.318716	0.151859	0.397401
	0.927921	0.542174	0.639835	0.53528	0.120403	0.130204	0.360071	0.174802
	1.57765	0.900038	1.31441	0.925849	0.305987	1.04175	0.245204	0.794536
	0.733068	0.637567	0.0694316	0.504632	0.0589936	0.566503	0.0492578	0.650528
	0.238835	0.363616	0.375667	0.316001	0.0814692	0.416825	0.0997517	0.322017
					0.481327	0.410057	0.476709	0.365738
					0.715603	0.189783	0.36181	0.11921
					0.106669	0.50248	0.196272	0.469098
					0.599368	0.321606	0.516864	0.236947
					0.674848	0.461041	0.387952	0.238384
					1.0081	1.05234	1.01475	0.783631
					1.58412	0.412221	0.777355	0.532611
					0.419313	0.9051	0.320063	0.789371
					0.108274	0.94996	0.300382	0.84828
					0.302768	0.354369	0.192728	0.498643
					0.678833	0.199469	0.253677	0.12045
					0.270215	0.556391	0.130411	0.443735
					0.131938	0.0895017	0.208665	0.145622
					0.280205	0.23047	0.543071	0.322262
					0.391225	0.305423	0.443074	0.427295
					0.021784	0.49356	0.229995	0.265133
					0.371374	0.523853	0.49939	0.461249
					0.245372	0.369605	0.288308	0.323697
					0.167406	0.470653	0.18577	0.658487
					0.280883	0.726247	0.342066	0.762324
					0.204303	0.350817	0.272272	0.516413
					0.679564	0.329226	0.706606	0.274679
					0.172447	0.699371	0.209659	0.601993
					0.0792044	0.486983	0.0677768	0.119535
					0.256826	0.395019	0.327892	0.406082
					0.376766	0.628191	0.39022	0.710197
					0.27168	0.733687	0.354003	0.779769
					0.0112959	0.723903	0.0257945	0.701322

## Sheet: Figure 3R cond_activity_Stats
	Figure 3R, Figure 3 - figure supplement 4
	Kruskal-Wallis test																Post-hoc
	P value	<0.0001															Number of families	1
	Exact or approximate P value?	Approximate															Number of comparisons per family	66
	P value summary	****															Alpha	0.05
	Do the medians vary signif. (P < 0.05)?	Yes
	Number of groups	12															Dunn's multiple comparisons test	Mean rank diff.	Significant?	Summary	Adjusted P Value
	Kruskal-Wallis statistic	184.611															Frz_CS_Hab vs. Mov_CS_Hab	-444.214	Yes	****	<0.0001
																	Frz_CS_Hab vs. Frz_noCS_Hab	-72.6532	No	ns	>0.9999
	Data summary																Frz_CS_Hab vs. Mov_noCS_Hab	-449.41	Yes	****	<0.0001
	Number of treatments (columns)	12															Frz_CS_Hab vs. Frz_CS_Train	-122.194	No	ns	>0.9999
	Number of values (total)	2136															Frz_CS_Hab vs. Mov_CS_Train	-443.174	Yes	****	<0.0001
																	Frz_CS_Hab vs. Frz_noCS_Train	-20.288	No	ns	>0.9999
																	Frz_CS_Hab vs. Mov_noCS_Train	-397.074	Yes	****	<0.0001
																	Frz_CS_Hab vs. Frz_CS_Ret	-85.57	No	ns	>0.9999
	Descriptive statistics	Frz_CS_Hab	Mov_CS_Hab	Frz_noCS_Hab	Mov_noCS_Hab	Frz_CS_Train	Mov_CS_Train	Frz_noCS_Train	Mov_noCS_Train	Frz_CS_Ret	Mov_CS_Ret	Frz_noCS_Ret	Mov_noCS_Ret				Frz_CS_Hab vs. Mov_CS_Ret	-343.533	Yes	****	<0.0001
	Number of values	173	173	173	173	201	201	201	201	160	160	160	160				Frz_CS_Hab vs. Frz_noCS_Ret	-155.32	No	ns	>0.9999
																	Frz_CS_Hab vs. Mov_noCS_Ret	-468.914	Yes	****	<0.0001
	Minimum	0	0.0160805	0	0.0510038	0.0112959	0.00215962	0.0257945	0.013133	0	0	0.0160015	2.92915e-09				Mov_CS_Hab vs. Frz_noCS_Hab	371.561	Yes	****	<0.0001
	25% Percentile	0.088804	0.24077	0.128231	0.283745	0.149818	0.254455	0.13276	0.244928	0.120159	0.127909	0.183571	0.231445				Mov_CS_Hab vs. Mov_noCS_Hab	-5.19653	No	ns	>0.9999
	Median	0.199067	0.393442	0.219333	0.387357	0.264109	0.395019	0.245653	0.377089	0.225237	0.358517	0.275812	0.424987				Mov_CS_Hab vs. Frz_CS_Train	322.02	Yes	****	<0.0001
	75% Percentile	0.38454	0.558118	0.42437	0.52993	0.397487	0.594329	0.335309	0.552342	0.489192	0.777589	0.417206	0.671037				Mov_CS_Hab vs. Mov_CS_Train	1.04032	No	ns	>0.9999
	Maximum	6.35738	1.17291	2.88716	1.09209	2.17028	1.33612	1.14536	1.24909	1.35375	2.59922	0.968541	1.46751				Mov_CS_Hab vs. Frz_noCS_Train	423.926	Yes	****	<0.0001
																	Mov_CS_Hab vs. Mov_noCS_Train	47.1398	No	ns	>0.9999
	Mean	0.427506	0.424345	0.368705	0.414926	0.323329	0.445389	0.271514	0.410918	0.314713	0.544788	0.314736	0.473261				Mov_CS_Hab vs. Frz_CS_Ret	358.644	Yes	****	<0.0001
	Std. Deviation	0.746406	0.218645	0.447514	0.194271	0.265336	0.268524	0.183567	0.230832	0.254208	0.546461	0.190608	0.302529				Mov_CS_Hab vs. Mov_CS_Ret	100.681	No	ns	>0.9999
	Std. Error of Mean	0.0567482	0.0166233	0.0340239	0.0147702	0.0187154	0.0189402	0.0129479	0.0162816	0.0200969	0.0432016	0.0150688	0.023917				Mov_CS_Hab vs. Frz_noCS_Ret	288.894	Yes	**	0.0013
																	Mov_CS_Hab vs. Mov_noCS_Ret	-24.6999	No	ns	>0.9999
	Lower 95% CI	0.315494	0.391533	0.301547	0.385772	0.286424	0.408041	0.245982	0.378812	0.275022	0.459465	0.284975	0.426025				Frz_noCS_Hab vs. Mov_noCS_Hab	-376.757	Yes	****	<0.0001
	Upper 95% CI	0.539519	0.457157	0.435863	0.44408	0.360234	0.482737	0.297046	0.443024	0.354404	0.630111	0.344497	0.520497				Frz_noCS_Hab vs. Frz_CS_Train	-49.5403	No	ns	>0.9999
																	Frz_noCS_Hab vs. Mov_CS_Train	-370.52	Yes	****	<0.0001
	Mean ranks	818.861	1263.08	891.514	1268.27	941.055	1262.04	839.149	1215.93	904.431	1162.39	974.181	1287.78				Frz_noCS_Hab vs. Frz_noCS_Train	52.3652	No	ns	>0.9999
																	Frz_noCS_Hab vs. Mov_noCS_Train	-324.421	Yes	****	<0.0001
																	Frz_noCS_Hab vs. Frz_CS_Ret	-12.9168	No	ns	>0.9999
																	Frz_noCS_Hab vs. Mov_CS_Ret	-270.879	Yes	**	0.0041
	Shapiro-Wilk test	Frz_CS_Hab	Mov_CS_Hab	Frz_noCS_Hab	Mov_noCS_Hab	Frz_CS_Train	Mov_CS_Train	Frz_noCS_Train	Mov_noCS_Train	Frz_CS_Ret	Mov_CS_Ret	Frz_noCS_Ret	Mov_noCS_Ret				Frz_noCS_Hab vs. Frz_noCS_Ret	-82.6668	No	ns	>0.9999
	W	0.5158	0.9671	0.6684	0.9606	0.7685	0.9503	0.8549	0.9599	0.8857	0.8393	0.912	0.9568				Frz_noCS_Hab vs. Mov_noCS_Ret	-396.26	Yes	****	<0.0001
	P value	<0.0001	0.0004	<0.0001	<0.0001	<0.0001	<0.0001	<0.0001	<0.0001	<0.0001	<0.0001	<0.0001	<0.0001				Mov_noCS_Hab vs. Frz_CS_Train	327.217	Yes	****	<0.0001
	Passed normality test (alpha=0.05)?	No	No	No	No	No	No	No	No	No	No	No	No				Mov_noCS_Hab vs. Mov_CS_Train	6.23685	No	ns	>0.9999
	P value summary	****	***	****	****	****	****	****	****	****	****	****	****				Mov_noCS_Hab vs. Frz_noCS_Train	429.122	Yes	****	<0.0001
																	Mov_noCS_Hab vs. Mov_noCS_Train	52.3364	No	ns	>0.9999
																	Mov_noCS_Hab vs. Frz_CS_Ret	363.84	Yes	****	<0.0001
																	Mov_noCS_Hab vs. Mov_CS_Ret	105.878	No	ns	>0.9999
																	Mov_noCS_Hab vs. Frz_noCS_Ret	294.09	Yes	***	0.0009
																	Mov_noCS_Hab vs. Mov_noCS_Ret	-19.5033	No	ns	>0.9999
																	Frz_CS_Train vs. Mov_CS_Train	-320.98	Yes	****	<0.0001
																	Frz_CS_Train vs. Frz_noCS_Train	101.906	No	ns	>0.9999
																	Frz_CS_Train vs. Mov_noCS_Train	-274.881	Yes	***	0.0005
																	Frz_CS_Train vs. Frz_CS_Ret	36.6235	No	ns	>0.9999
																	Frz_CS_Train vs. Mov_CS_Ret	-221.339	Yes	*	0.0466
																	Frz_CS_Train vs. Frz_noCS_Ret	-33.1265	No	ns	>0.9999
																	Frz_CS_Train vs. Mov_noCS_Ret	-346.72	Yes	****	<0.0001
																	Mov_CS_Train vs. Frz_noCS_Train	422.886	Yes	****	<0.0001
																	Mov_CS_Train vs. Mov_noCS_Train	46.0995	No	ns	>0.9999
																	Mov_CS_Train vs. Frz_CS_Ret	357.604	Yes	****	<0.0001
																	Mov_CS_Train vs. Mov_CS_Ret	99.6411	No	ns	>0.9999
																	Mov_CS_Train vs. Frz_noCS_Ret	287.854	Yes	***	0.0007
																	Mov_CS_Train vs. Mov_noCS_Ret	-25.7402	No	ns	>0.9999
																	Frz_noCS_Train vs. Mov_noCS_Train	-376.786	Yes	****	<0.0001
																	Frz_noCS_Train vs. Frz_CS_Ret	-65.282	No	ns	>0.9999
																	Frz_noCS_Train vs. Mov_CS_Ret	-323.245	Yes	****	<0.0001
																	Frz_noCS_Train vs. Frz_noCS_Ret	-135.032	No	ns	>0.9999
																	Frz_noCS_Train vs. Mov_noCS_Ret	-448.626	Yes	****	<0.0001
																	Mov_noCS_Train vs. Frz_CS_Ret	311.504	Yes	***	0.0001
																	Mov_noCS_Train vs. Mov_CS_Ret	53.5416	No	ns	>0.9999
																	Mov_noCS_Train vs. Frz_noCS_Ret	241.754	Yes	*	0.0142
																	Mov_noCS_Train vs. Mov_noCS_Ret	-71.8397	No	ns	>0.9999
																	Frz_CS_Ret vs. Mov_CS_Ret	-257.962	Yes	*	0.0121
																	Frz_CS_Ret vs. Frz_noCS_Ret	-69.75	No	ns	>0.9999
																	Frz_CS_Ret vs. Mov_noCS_Ret	-383.344	Yes	****	<0.0001
																	Mov_CS_Ret vs. Frz_noCS_Ret	188.213	No	ns	0.4187
																	Mov_CS_Ret vs. Mov_noCS_Ret	-125.381	No	ns	>0.9999
																	Frz_noCS_Ret vs. Mov_noCS_Ret	-313.594	Yes	***	0.0004
																	Test details	Mean rank 1	Mean rank 2	Mean rank diff.	n1	n2	Z
																	Frz_CS_Hab vs. Mov_CS_Hab	818.861	1263.08	-444.214	173	173	6.69866
																	Frz_CS_Hab vs. Frz_noCS_Hab	818.861	891.514	-72.6532	173	173	1.0956
																	Frz_CS_Hab vs. Mov_noCS_Hab	818.861	1268.27	-449.41	173	173	6.77702
																	Frz_CS_Hab vs. Frz_CS_Train	818.861	941.055	-122.194	173	201	1.91039
																	Frz_CS_Hab vs. Mov_CS_Train	818.861	1262.04	-443.174	173	201	6.92862
																	Frz_CS_Hab vs. Frz_noCS_Train	818.861	839.149	-20.288	173	201	0.317184
																	Frz_CS_Hab vs. Mov_noCS_Train	818.861	1215.93	-397.074	173	201	6.2079
																	Frz_CS_Hab vs. Frz_CS_Ret	818.861	904.431	-85.57	173	160	1.26494
																	Frz_CS_Hab vs. Mov_CS_Ret	818.861	1162.39	-343.533	173	160	5.07828
																	Frz_CS_Hab vs. Frz_noCS_Ret	818.861	974.181	-155.32	173	160	2.29602
																	Frz_CS_Hab vs. Mov_noCS_Ret	818.861	1287.78	-468.914	173	160	6.93173
																	Mov_CS_Hab vs. Frz_noCS_Hab	1263.08	891.514	371.561	173	173	5.60306
																	Mov_CS_Hab vs. Mov_noCS_Hab	1263.08	1268.27	-5.19653	173	173	0.0783627
																	Mov_CS_Hab vs. Frz_CS_Train	1263.08	941.055	322.02	173	201	5.0345
																	Mov_CS_Hab vs. Mov_CS_Train	1263.08	1262.04	1.04032	173	201	0.0162644
																	Mov_CS_Hab vs. Frz_noCS_Train	1263.08	839.149	423.926	173	201	6.6277
																	Mov_CS_Hab vs. Mov_noCS_Train	1263.08	1215.93	47.1398	173	201	0.736989
																	Mov_CS_Hab vs. Frz_CS_Ret	1263.08	904.431	358.644	173	160	5.30166
																	Mov_CS_Hab vs. Mov_CS_Ret	1263.08	1162.39	100.681	173	160	1.48833
																	Mov_CS_Hab vs. Frz_noCS_Ret	1263.08	974.181	288.894	173	160	4.27058
																	Mov_CS_Hab vs. Mov_noCS_Ret	1263.08	1287.78	-24.6999	173	160	0.365126
																	Frz_noCS_Hab vs. Mov_noCS_Hab	891.514	1268.27	-376.757	173	173	5.68143
																	Frz_noCS_Hab vs. Frz_CS_Train	891.514	941.055	-49.5403	173	201	0.774518
																	Frz_noCS_Hab vs. Mov_CS_Train	891.514	1262.04	-370.52	173	201	5.79275
																	Frz_noCS_Hab vs. Frz_noCS_Train	891.514	839.149	52.3652	173	201	0.818683
																	Frz_noCS_Hab vs. Mov_noCS_Train	891.514	1215.93	-324.421	173	201	5.07203
																	Frz_noCS_Hab vs. Frz_CS_Ret	891.514	904.431	-12.9168	173	160	0.190943
																	Frz_noCS_Hab vs. Mov_CS_Ret	891.514	1162.39	-270.879	173	160	4.00428
																	Frz_noCS_Hab vs. Frz_noCS_Ret	891.514	974.181	-82.6668	173	160	1.22202
																	Frz_noCS_Hab vs. Mov_noCS_Ret	891.514	1287.78	-396.26	173	160	5.85773
																	Mov_noCS_Hab vs. Frz_CS_Train	1268.27	941.055	327.217	173	201	5.11575
																	Mov_noCS_Hab vs. Mov_CS_Train	1268.27	1262.04	6.23685	173	201	0.0975076
																	Mov_noCS_Hab vs. Frz_noCS_Train	1268.27	839.149	429.122	173	201	6.70895
																	Mov_noCS_Hab vs. Mov_noCS_Train	1268.27	1215.93	52.3364	173	201	0.818232
																	Mov_noCS_Hab vs. Frz_CS_Ret	1268.27	904.431	363.84	173	160	5.37848
																	Mov_noCS_Hab vs. Mov_CS_Ret	1268.27	1162.39	105.878	173	160	1.56514
																	Mov_noCS_Hab vs. Frz_noCS_Ret	1268.27	974.181	294.09	173	160	4.3474
																	Mov_noCS_Hab vs. Mov_noCS_Ret	1268.27	1287.78	-19.5033	173	160	0.288308
																	Frz_CS_Train vs. Mov_CS_Train	941.055	1262.04	-320.98	201	201	5.21734
																	Frz_CS_Train vs. Frz_noCS_Train	941.055	839.149	101.906	201	201	1.65641
																	Frz_CS_Train vs. Mov_noCS_Train	941.055	1215.93	-274.881	201	201	4.46802
																	Frz_CS_Train vs. Frz_CS_Ret	941.055	904.431	36.6235	201	160	0.560469
																	Frz_CS_Train vs. Mov_CS_Ret	941.055	1162.39	-221.339	201	160	3.38727
																	Frz_CS_Train vs. Frz_noCS_Ret	941.055	974.181	-33.1265	201	160	0.506953
																	Frz_CS_Train vs. Mov_noCS_Ret	941.055	1287.78	-346.72	201	160	5.30605
																	Mov_CS_Train vs. Frz_noCS_Train	1262.04	839.149	422.886	201	201	6.87375
																	Mov_CS_Train vs. Mov_noCS_Train	1262.04	1215.93	46.0995	201	201	0.74932
																	Mov_CS_Train vs. Frz_CS_Ret	1262.04	904.431	357.604	201	160	5.4726
																	Mov_CS_Train vs. Mov_CS_Ret	1262.04	1162.39	99.6411	201	160	1.52486
																	Mov_CS_Train vs. Frz_noCS_Ret	1262.04	974.181	287.854	201	160	4.40518
																	Mov_CS_Train vs. Mov_noCS_Ret	1262.04	1287.78	-25.7402	201	160	0.393916
																	Frz_noCS_Train vs. Mov_noCS_Train	839.149	1215.93	-376.786	201	201	6.12443
																	Frz_noCS_Train vs. Frz_CS_Ret	839.149	904.431	-65.282	201	160	0.999046
																	Frz_noCS_Train vs. Mov_CS_Ret	839.149	1162.39	-323.245	201	160	4.94679
																	Frz_noCS_Train vs. Frz_noCS_Ret	839.149	974.181	-135.032	201	160	2.06647
																	Frz_noCS_Train vs. Mov_noCS_Ret	839.149	1287.78	-448.626	201	160	6.86557
																	Mov_noCS_Train vs. Frz_CS_Ret	1215.93	904.431	311.504	201	160	4.76712
																	Mov_noCS_Train vs. Mov_CS_Ret	1215.93	1162.39	53.5416	201	160	0.819376
																	Mov_noCS_Train vs. Frz_noCS_Ret	1215.93	974.181	241.754	201	160	3.6997
																	Mov_noCS_Train vs. Mov_noCS_Ret	1215.93	1287.78	-71.8397	201	160	1.0994
																	Frz_CS_Ret vs. Mov_CS_Ret	904.431	1162.39	-257.962	160	160	3.74101
																	Frz_CS_Ret vs. Frz_noCS_Ret	904.431	974.181	-69.75	160	160	1.01153
																	Frz_CS_Ret vs. Mov_noCS_Ret	904.431	1287.78	-383.344	160	160	5.55931
																	Mov_CS_Ret vs. Frz_noCS_Ret	1162.39	974.181	188.213	160	160	2.72949
																	Mov_CS_Ret vs. Mov_noCS_Ret	1162.39	1287.78	-125.381	160	160	1.8183
																	Frz_noCS_Ret vs. Mov_noCS_Ret	974.181	1287.78	-313.594	160	160	4.54779
