# Supplementary material for: A striatal circuit balances learned fear in the presence and absence of sensory cues
Source: eLife. 2023 Jan 19;12:e75703. doi: 10.7554/eLife.75703 (PMC9897731; doi:10.7554/eLife.75703)
Supplement: Figure 4—source data 1. [file elife-75703-fig4-data1.xlsx]

## Sheet: Figure 4B Adora_Data
	Figure 4B - Adora2a movement indices
	before light	during light
	831.411	1045.78
	742.4	723.958
	766.325	734.419
	834.8	729.397
	1169.18	983.808
	408.161	702.636
	748.553	1013.12
	1041.78	637.264

## Sheet: Figure 4B Adora_Stats
	Figure 4B - Adora
	Wilcoxon matched-pairs signed rank test				Shapiro-Wilk normality test	before light	during light
	P value	>0.9999			W	0.9278	0.8182
	Exact or approximate P value?	Exact			P value	0.4961	0.0447
	P value summary	ns			Passed normality test (alpha=0.05)?	Yes	No
	Significantly different (P < 0.05)?	No			P value summary	ns	*
	One- or two-tailed P value?	Two-tailed
	Sum of positive, negative ranks	18.00 , -18.00
	Sum of signed ranks (W)	0
	Number of pairs	8
	Number of ties (ignored)	0
	Median of differences
	Median	25.17
	How effective was the pairing?
	rs (Spearman)	0.1429
	P value (one tailed)	0.376
	P value summary	ns
	Was the pairing significantly effective?	No
	Descriptive statistics	before light	during light
	Number of values	8	8
	Minimum	408.161	637.264
	25% Percentile	743.938	707.967
	Median	798.868	731.908
	75% Percentile	990.038	1005.79
	Maximum	1169.18	1045.78
	Range	761.019	408.519
	Mean	817.827	821.298
	Std. Deviation	225.213	163.452
	Std. Error of Mean	79.6247	57.7889
	Lower 95% CI of mean	-0.250723	0.54106
	Upper 95% CI of mean	1.22837	-1.94384

## Sheet: Figure 4C D1R_Data
	Figure 4B - Drd1a movement indices
	before light	during light
	676.367	893.297
	869.944	665.631
	641.486	869.75
	777.203	859.219
	847.903	920.572
	929.594	855.019
	1002.75	786.603

## Sheet: Figure 4C D1R_Stats
	Figure 4B - D1R
	Paired t test						Shapiro-Wilk normality test	before light	during light
	P value	0.8368					W	0.9628	0.85
	P value summary	ns					P value	0.8427	0.123
	Significantly different (P < 0.05)?	No					Passed normality test (alpha=0.05)?	Yes	Yes
	One- or two-tailed P value?	Two-tailed					P value summary	ns	ns
	t, df	t=0.2151, df=6
	Number of pairs	7
	How big is the difference?
	Mean of differences (B - A)	-14.98
	SD of differences	184.2
	SEM of differences	69.63
	95% confidence interval	-185.4 to 155.4
	R squared (partial eta squared)	0.007653
	How effective was the pairing?
	Correlation coefficient (r)	-0.4212
	P value (one tailed)	0.1733
	P value summary	ns
	Was the pairing significantly effective?	No
	Descriptive statistics	before light	during light
	Number of values	7	7
	Minimum	641.486	665.631
	25% Percentile	676.367	786.603
	Median	847.903	859.219
	75% Percentile	929.594	893.297
	Maximum	1002.75	920.572
	Range	361.261	254.942
	Mean	820.749	835.727
	Std. Deviation	131.025	85.5772
	Std. Error of Mean	49.523	32.3451
	Lower 95% CI of mean	-0.14482	-1.55582
	Upper 95% CI of mean	-1.10152	2.4965

## Sheet: Figure4 - Suppl3D_Data
	Figure 4 - figure supplement 3D
	mouse ID	av_mov_index_light_2ms	av_mov_index_no_light_2ms	av_mov_index_light_5ms	av_mov_index_no_light_5ms
	FV9009	16683.9	15167.1	12820	14262
	FV9011	13229.4	13874.4	12458.3	14986.7
	FV9013	16822.9	16056.7	13140.1	11019.3
	FV9014	10842.6	10865.9	13984.7	11143.8
	FV9015	10693.3	11726.8	13139	11446.5
	FV9017	10043.7	11550.5	12208	13412.2

## Sheet: Figure4 - Suppl3D_Stats
	Figure 4 - figure supplement 3D
	Shapiro-Wilk normality test	av_mov_index_light_2ms	av_mov_index_no_light_2ms	av_mov_index_light_5ms	av_mov_index_no_light_5ms
	W	0.8325	0.904	0.9506	0.8643
	P value	0.1129	0.398	0.7449	0.2043
	Passed normality test (alpha=0.05)?	Yes	Yes	Yes	Yes
	P value summary	ns	ns	ns	ns
	2 ms light pulses: light vs no light			5 ms light pulses: light vs no light
	Paired t test			Paired t test
	P value	0.7538		P value	0.7978
	P value summary	ns		P value summary	ns
	Significantly different (P < 0.05)?	No		Significantly different (P < 0.05)?	No
	One- or two-tailed P value?	Two-tailed		One- or two-tailed P value?	Two-tailed
	t, df	t=0.3313, df=5		t, df	t=0.2702, df=5
	Number of pairs	6		Number of pairs	6
	How big is the difference?			How big is the difference?
	Mean of differences (B - A)	154.2		Mean of differences (B - A)	-246.6
	SD of differences	1140		SD of differences	2236
	SEM of differences	465.5		SEM of differences	912.7
	95% confidence interval	-1042 to 1351		95% confidence interval	-2593 to 2100
	R squared (partial eta squared)	0.02149		R squared (partial eta squared)	0.01439
	How effective was the pairing?			How effective was the pairing?
	Correlation coefficient (r)	0.9664		Correlation coefficient (r)	-0.7438
	P value (one tailed)	0.0008		P value (one tailed)	0.045
	P value summary	***		P value summary	*
	Was the pairing significantly effective?	Yes		Was the pairing significantly effective?	Yes
