# Supplementary material for: A striatal circuit balances learned fear in the presence and absence of sensory cues
Source: eLife. 2023 Jan 19;12:e75703. doi: 10.7554/eLife.75703 (PMC9897731; doi:10.7554/eLife.75703)
Supplement: Figure 5—source data 1. [file elife-75703-fig5-data1.xlsx]

## Sheet: Figure 5E_Train_CS_Data
	Figure 5E, Training CS
	GFP_CS										Arch_CS
Mouse ID	FU2339	FU2409	FU3025	FU3610	FU3611	FU3652	FU6852	FU6866	FU3097	FU6865	FU2410	FU2411	FU3024	FU3615	FU3653	FU5759	FU5760	FU5803	FU6848	FU3022	FU6847	FU6851
CS #1	2.88889	13.1111	0	3.77778	0	10.6667	11.2222	17.5556	0	10.4444	7.44444	1.88889	5.22222	3.33333	4.55556	3.11111	0	4.55556	1.66667	0	2.77778	0
CS #2	2.88889	10.6667	8.11111	3.44444	6.44444	40.2222	2.55556	7.44444	5.11111	6.77778	3	12.4444	10.1111	2	14.7778	31.8889	4.11111	8.66667	24.3333	0	9.77778	11.4444
CS #3	19.4444	15.6667	43.4445	36.7778	4.44444	40.7778	28	17.2222	0	24.4444	10	25.1111	32	5.66667	27.4444	21	3.66667	11	40.5556	5	35.6667	1.66667
CS #4	19.6667	12.7778	12.2222	15.8889	52.5556	9.77778	20.8889	15	11	47.3333	7.11111	60.2222	37.1111	44.7778	45.5556	20.4444	26.4444	33.7778	24.1111	17.5556	34.5555	15.2222
CS #5	43.5556	48.5556	52	39.2222	85.3333	52.2222	62.3333	71.1111	5.11111	15.1111	33.4445	46.4444	38.6667	52.7778	22.5556	29.2222	28.4444	31.8889	68.7778	5.33333	9.44444	9.22222
CS #6	36.6667	84.3333	47.4445	29.1111	18.1111	53.3333	44.2222	39.7778	20.1111	23.7778	9.33333	90.7778	35.8889	44.4445	56.7778	15.6667	18.3333	32.8889	34	12.6667	18.3333	5.55556

## Sheet: Figure 5E_Train_CS_Stats
	Figure 5E, Training CS
	Two-way RM ANOVA	Matching: Stacked									Post-hoc
	Assume sphericity?	No									Compare row means (main row effect)
	Alpha	0.05
											Number of families	1
	Source of Variation	% of total variation	P value	P value summary	Significant?	Geisser-Greenhouse's epsilon					Number of comparisons per family	6
	Time x Group	3.789	0.0901	ns	No						Alpha	0.05
	Time	38.66	<0.0001	****	Yes	0.7598
	Group	0.9088	0.3376	ns	No						Šídák's multiple comparisons test	Mean Diff.	95.00% CI of diff.	Below threshold?	Summary	Adjusted P Value
	Subject	18.83	0.0019	**	Yes
											GFP_CS - Arch_CS
	ANOVA table	SS	DF	MS	F (DFn, DFd)	P value					CS1	4.087	-2.708 to 10.88	No	ns	0.3969
	Time x Group	1989	5	397.7	F (5, 100) = 1.967	P=0.0901					CS2	-1.68	-14.79 to 11.43	No	ns	0.9994
	Time	20289	5	4058	F (3.799, 75.98) = 20.06	P<0.0001					CS3	4.791	-13.10 to 22.68	No	ns	0.9695
	Group	477	1	477	F (1, 20) = 0.9651	P=0.3376					CS4	-8.863	-27.96 to 10.23	No	ns	0.7162
	Subject	9884	20	494.2	F (20, 100) = 2.444	P=0.0019					CS5	16.1	-11.65 to 43.86	No	ns	0.4772
	Residual	20226	100	202.3							CS6	8.467	-18.85 to 35.79	No	ns	0.9413
	Difference between column means
	Mean of GFP_CS	24.7									Test details	Mean 1	Mean 2	Mean Diff.	SE of diff.	N1	N2	t	DF
	Mean of Arch_CS	20.88
	Difference between means	3.818									GFP_CS - Arch_CS
	SE of difference	3.886									CS1	6.967	2.88	4.087	2.126	10	12	1.922	11
	95% CI of difference	-4.289 to 11.92									CS2	9.367	11.05	-1.68	4.428	10	12	0.3793	17.63
											CS3	23.02	18.23	4.791	6.089	10	12	0.7868	18.78
	Data summary										CS4	21.71	30.57	-8.863	6.513	10	12	1.361	19.15
	Number of columns (Group)	2									CS5	47.46	31.35	16.1	9.327	10	12	1.727	16.93
	Number of rows (Time)	6									CS6	39.69	31.22	8.467	9.363	10	12	0.9043	19.99
	Number of subjects (Subject)	22
	Number of missing values	0

## Sheet: Figure 5E_Train_noCS_Data
	Figure 5E, Training no CS
	GFP_CS										Arch_CS
Mouse ID	FU2339	FU2409	FU3025	FU3610	FU3611	FU3652	FU6852	FU6866	FU3097	FU6865	FU2410	FU2411	FU3024	FU3615	FU3653	FU5759	FU5760	FU5803	FU6848	FU3022	FU6847	FU6851
CS #1	3	34.8889	17.4444	5.22222	25	51.7778	11.5556	2.44444	5.33333	5.88889	14.3333	29.5556	12.1111	27	11.3333	22	9	0	0	0	26.1111	12.7778
CS #2	17.2222	59.8889	14.8889	14.7778	39.6667	77.4445	6.55556	20.7778	4.44444	6	27.4444	28.1111	34.3333	22.1111	22.2222	29.2222	14.8889	13.3333	50.8889	1.77778	49.2222	22.3333
CS #3	12.2222	23	29	26.6667	82	83.4445	35.8889	36.6667	20.5556	15.7778	7.44444	52	40.4445	36.2222	25	8.11111	23.7778	8	55.6667	14.4444	69.8889	38.2222
CS #4	32.1111	83.6667	8.66667	53.3333	85	91.5555	70.2222	41.7778	10.8889	28.8889	19.1111	46.2222	39.8889	50.8889	40.3333	48.7778	48.7778	47.3333	74.6667	25.7778	46.4445	45.7778
CS #5	36.5556	67.5555	27.2222	42.1111	90.8889	67.8889	78	44.6667	27.5556	10.8889	34.3333	89.6667	49.7778	40.6667	69	32.5555	30.5556	27.1111	60.8889	1.44444	38.3333	29.3333
CS #6	29.1111	89.4445	62.6667	45.5556	74.1111	39.7778	72.3333	24.8889	21.7778	58	13.4444	70.6667	35.7778	63.1111	66.4445	39.4444	15.8889	0.888889	64.4444	29.7778	42.6667	35.4444

## Sheet: Figure 5E_Train_noCS_Stats
	Figure 5E, Training no CS
	Two-way RM ANOVA	Matching: Stacked									Post-hoc
	Assume sphericity?	No									Compare row means (main row effect)
	Alpha	0.05
											Number of families	1
	Source of Variation	% of total variation	P value	P value summary	Significant?	Geisser-Greenhouse's epsilon					Number of comparisons per family	6
	Time x Group	0.6279	0.8197	ns	No						Alpha	0.05
	Time	25.18	<0.0001	****	Yes	0.7724
	Group	1.302	0.4541	ns	No						Šídák's multiple comparisons test	Mean Diff.	95.00% CI of diff.	Below threshold?	Summary	Adjusted P Value
	Subject	44.67	<0.0001	****	Yes
											GFP_noCS - Arch_noCS
	ANOVA table	SS	DF	MS	F (DFn, DFd)	P value					CS1	2.57	-15.69 to 20.83	No	ns	0.9988
	Time x Group	469.8	5	93.97	F (5, 100) = 0.4398	P=0.8197					CS2	-0.1574	-27.35 to 27.03	No	ns	>0.9999
	Time	18838	5	3768	F (3.862, 77.24) = 17.63	P<0.0001					CS3	4.92	-24.90 to 34.74	No	ns	0.9975
	Group	974.4	1	974.4	F (1, 20) = 0.5830	P=0.4541					CS4	6.111	-26.99 to 39.21	No	ns	0.9939
	Subject	33427	20	1671	F (20, 100) = 7.823	P<0.0001					CS5	7.361	-23.42 to 38.14	No	ns	0.9824
	Residual	21365	100	213.7							CS6	11.93	-16.93 to 40.80	No	ns	0.8078
	Difference between column means
	Mean of GFP_CS	38.44									Test details	Mean 1	Mean 2	Mean Diff.	SE of diff.	N1	N2	t	DF
	Mean of Arch_CS	32.99
	Difference between means	5.456									GFP_noCS - Arch_noCS
	SE of difference	7.146									CS1	16.26	13.69	2.57	6.031	10	12	0.4262	14.91
	95% CI of difference	-9.450 to 20.36									CS2	26.17	26.32	-0.1574	8.85	10	12	0.01779	13.6
											CS3	36.52	31.6	4.92	10.05	10	12	0.4897	17.28
	Data summary										CS4	50.61	44.5	6.111	10.52	10	12	0.5808	11.9
	Number of columns (Group)	2									CS5	49.33	41.97	7.361	10.44	10	12	0.7048	18.31
	Number of rows (Time)	6									CS6	51.77	39.83	11.93	9.848	10	12	1.212	19.2
	Number of subjects (Subject)	22
	Number of missing values	0

## Sheet: Figure 5G_Ret_CS_Data
	Figure 5G, Retrieval CS
	GFP_CS										Arch_CS
Mouse ID	FU2339	FU2409	FU3025	FU3610	FU3611	FU3652	FU6852	FU6866	FU3097	FU6865	FU2410	FU2411	FU3024	FU3615	FU3653	FU5759	FU5760	FU5803	FU6848	FU3022	FU6847	FU6851
CS #1	60.3333	49.3333	36.1111	59.3333	87.1111	64.7778	43.1111	55.5555	38.5555	67.6667	27.2222	45.1111	32.3333	63.8889	43.2222	23.3333	37.6667	44.8889	39.4444	21.3333	36.6667	46.2222
CS #2	61.8889	60	28.5556	57.7778	68.2222	71.6667	51.8889	65.2222	21.6667	61.2222	55.1111	38.7778	62.7778	69.7778	33.3333	28.3333	32.6667	39.7778	70.3333	4.55556	68.6667	34.7778
CS #3	35.3333	40	18.4444	71.6667	66.6667	72.6667	56	65.1111	17.1111	43.8889	16	45.1111	53	40	39.8889	25.6667	27.5556	16.1111	42.8889	15.8889	43.4445	42.5556
CS #4	29.7778	47.8889	39.5556	77.3333	71.7778	79.5556	66.6667	76.2222	18.4444	45.2222	50.6667	41.7778	58.5556	43.4445	70	21.3333	24.4444	23.4444	64.6667	44.6667	37.6667	55.6667

## Sheet: Figure 5G_Ret_CS_Stats
	Figure 5G, Retrieval CS
	Two-way RM ANOVA	Matching: Stacked									Post-hoc
	Assume sphericity?	No									Compare row means (main row effect)
	Alpha	0.05
											Number of families	1
	Source of Variation	% of total variation	P value	P value summary	Significant?	Geisser-Greenhouse's epsilon					Number of comparisons per family	4
	Time x Group	0.769	0.6472	ns	No						Alpha	0.05
	Time	3.698	0.0724	ns	No	0.7728
	Group	13.2	0.0395	*	Yes						Šídák's multiple comparisons test	Mean Diff.	95.00% CI of diff.	Below threshold?	Summary	Adjusted P Value
	Subject	54.39	<0.0001	****	Yes
											GFP_CS - Arch_CS
	ANOVA table	SS	DF	MS	F (DFn, DFd)	P value					CS1	17.74	1.240 to 34.25	Yes	*	0.0324
	Time x Group	222.2	3	74.05	F (3, 60) = 0.5544	P=0.6472					CS2	9.904	-11.75 to 31.55	No	ns	0.6396
	Time	1068	3	356.1	F (2.318, 46.37) = 2.666	P=0.0724					CS3	14.68	-6.940 to 36.30	No	ns	0.2636
	Group	3813	1	3813	F (1, 20) = 4.853	P=0.0395					CS4	10.55	-12.82 to 33.92	No	ns	0.6377
	Subject	15713	20	785.7	F (20, 60) = 5.882	P<0.0001
	Residual	8014	60	133.6
	Difference between column means
	Mean of GFP_CS	53.73									Test details	Mean 1	Mean 2	Mean Diff.	SE of diff.	N1	N2	t	DF
	Mean of Arch_CS	40.51
	Difference between means	13.22									GFP_CS - Arch_CS
	SE of difference	6.001									CS1	56.19	38.44	17.74	5.914	10	12	3	16.63
	95% CI of difference	0.7019 to 25.74									CS2	54.81	44.91	9.904	7.914	10	12	1.251	20
											CS3	48.69	34.01	14.68	7.615	10	12	1.928	14.55
	Data summary										CS4	55.24	44.69	10.55	8.348	10	12	1.264	16.23
	Number of columns (Group)	2
	Number of rows (Time)	4
	Number of subjects (Subject)	22
	Number of missing values	0

## Sheet: Figure 5G_Ret_noCS_Data
	Figure 5G, Retrieval no CS
	GFP_CS										Arch_CS
Mouse ID	FU2339	FU2409	FU3025	FU3610	FU3611	FU3652	FU6852	FU6866	FU3097	FU6865	FU2410	FU2411	FU3024	FU3615	FU3653	FU5759	FU5760	FU5803	FU6848	FU3022	FU6847	FU6851
CS #1	15.3333	35.8889	29.8889	10.4444	68.7778	33.7778	21.4444	19.1111	25.1111	34.5555	23.1111	41.4445	44.3333	21.7778	59.1111	5	5.44444	13.3333	44.8889	18.3333	48.4444	43.1111
CS #2	17.1111	19.8889	6.11111	20.5556	19.6667	22.1111	38.6667	25.8889	29	35.4444	15.3333	31.8889	35.4444	14.5556	62.8889	9.66667	20	6.44444	47.3333	26.4444	58.6667	28.3333
CS #3	12.5556	24.2222	18.4444	24.6667	14.3333	44.2222	14.8889	30.3333	20.4444	14.4444	5.55556	56.7778	45.2222	16.3333	33.7778	27	15.8889	3.11111	28.3333	17.8889	3.77778	4.66667
CS #4	36.3333	42.1111	25	16.6667	29.1111	36.5556	0	21.2222	28.8889	17.7778	44.7778	54.3333	24.7778	6.77778	72.3333	31	7.33333	7.77778	62.4444	4.77778	8.66667	5

## Sheet: Figure 5G_Ret_noCS_Stats
	Figure 5G, Retrieval no CS
	Two-way RM ANOVA	Matching: Stacked									Post-hoc
	Assume sphericity?	No									Compare row means (main row effect)
	Alpha	0.05
											Number of families	1
	Source of Variation	% of total variation	P value	P value summary	Significant?	Geisser-Greenhouse's epsilon					Number of comparisons per family	4
	Time x Group	0.546	0.8663	ns	No						Alpha	0.05
	Time	3.221	0.2472	ns	No	0.8491
	Group	0.4985	0.6619	ns	No						Šídák's multiple comparisons test	Mean Diff.	95.00% CI of diff.	Below threshold?	Summary	Adjusted P Value
	Subject	50.6	0.0001	***	Yes
											GFP_CS - Arch_CS
	ANOVA table	SS	DF	MS	F (DFn, DFd)	P value					CS1	-1.261	-21.43 to 18.90	No	ns	0.9997
	Time x Group	131.2	3	43.73	F (3, 60) = 0.2425	P=0.8663					CS2	-6.306	-23.34 to 10.73	No	ns	0.7822
	Time	773.8	3	257.9	F (2.547, 50.94) = 1.431	P=0.2472					CS3	0.3278	-15.91 to 16.56	No	ns	>0.9999
	Group	119.8	1	119.8	F (1, 20) = 0.1970	P=0.6619					CS4	-2.133	-24.99 to 20.72	No	ns	0.9983
	Subject	12158	20	607.9	F (20, 60) = 3.372	P=0.0001
	Residual	10818	60	180.3
	Difference between column means
	Mean of GFP_CS	25.02									Test details	Mean 1	Mean 2	Mean Diff.	SE of diff.	N1	N2	t	DF
	Mean of Arch_CS	27.37
	Difference between means	-2.343									GFP_CS - Arch_CS
	SE of difference	5.278									CS1	29.43	30.69	-1.261	7.367	10	12	0.1712	19.88
	95% CI of difference	-13.35 to 8.668									CS2	23.44	29.75	-6.306	6.113	10	12	1.032	16.85
											CS3	21.86	21.53	0.3278	5.862	10	12	0.05591	17.76
	Data summary										CS4	25.37	27.5	-2.133	8.186	10	12	0.2606	16.56
	Number of columns (Group)	2
	Number of rows (Time)	4
	Number of subjects (Subject)	22
	Number of missing values	0
