# Supplementary material for: A striatal circuit balances learned fear in the presence and absence of sensory cues
Source: eLife. 2023 Jan 19;12:e75703. doi: 10.7554/eLife.75703 (PMC9897731; doi:10.7554/eLife.75703)
Supplement: Figure 6—source data 1. [file elife-75703-fig6-data1.xlsx]

## Sheet: Figure 6E_Train_CS_Data
	Figure 6E, Training CS
	GFP_CS								Arch_CS
Mouse ID	FU2273	FU2970	FU3017	FU3539	FU3542	FU3543	FV1291	FV1335	FU2202	FU3015	FU3016	FU3537	FU3544	FU3565	FU3566	FV1288	FV1317	FV1336	FU2203
CS #1	11.7778	3.33333	10.2222	3.77778	15.6667	10.4444	0	0	50.2222	1.77778	0	5.11111	3.11111	4.55556	6.77778	0	0	2.11111	21.7778
CS #2	7.22222	0	0	22.5556	13	9.33333	4	10.7778	7.44444	0	3.22222	3.55556	19.6667	5.22222	0	26.2222	9.22222	13.6667	5.44444
CS #3	6.11111	8.33333	9.66667	68.4444	35.6667	37.7778	16.8889	0	37	36.7778	1.66667	35.7778	41.6667	17.4444	18.3333	19.2222	29.4444	23.4444	11
CS #4	42.6667	9.33333	17.8889	49.8889	54.1111	52.7778	9.77778	7.33333	50.4445	11.7778	60.8889	19.7778	18.3333	36.4444	20.6667	24	55.1111	54.1111	36.5556
CS #5	22.3333	38.8889	27	85.1111	59.5555	70.1111	66	42.4444	80.7778	41.4445	42.1111	74.8889	79.1111	56.2222	23	64.7778	54.6667	70.3333	12.5556
CS #6	47.8889	35.3333	20.3333	50.6667	43.3333	51.7778	56	64.8889	56.3333	14.4444	75.1111	64.6667	53.6667	32.4444	60.7778	74.6667	80.1111	50.6667	21.2222

## Sheet: Figure 6E_Train_CS_Stats
	Figure 6E, Training CS
	Two-way RM ANOVA	Matching: Stacked									Post-hoc
	Assume sphericity?	No									Compare row means (main row effect)
	Alpha	0.05
											Number of families	1
	Source of Variation	% of total variation	P value	P value summary	Significant?	Geisser-Greenhouse's epsilon					Number of comparisons per family	6
	Time x Group	0.1986	0.9877	ns	No						Alpha	0.05
	Time	52.91	<0.0001	****	Yes	0.7022
	Group	0.394	0.5279	ns	No						Šídák's multiple comparisons test	Mean Diff.	95.00% CI of diff.	Below threshold?	Summary	Adjusted P Value
	Subject	16.12	0.0008	***	Yes
											GFP_CS - Arch_CS
	ANOVA table	SS	DF	MS	F (DFn, DFd)	P value					CS1	-1.774	-17.12 to 13.57	No	ns	0.9996
	Time x Group	133.4	5	26.68	F (5, 85) = 0.1197	P=0.9877					CS2	-0.154	-11.03 to 10.72	No	ns	>0.9999
	Time	35529	5	7106	F (3.511, 59.68) = 31.88	P<0.0001					CS3	-1.846	-31.05 to 27.35	No	ns	>0.9999
	Group	264.6	1	264.6	F (1, 17) = 0.4154	P=0.5279					CS4	-4.811	-33.07 to 23.45	No	ns	0.9964
	Subject	10827	17	636.9	F (17, 85) = 2.857	P=0.0008					CS5	-3.105	-34.46 to 28.25	No	ns	0.9998
	Residual	18947	85	222.9							CS6	-6.823	-31.22 to 17.58	No	ns	0.9604
	Difference between column means
	Mean of GFP_CS	27.72									Test details	Mean 1	Mean 2	Mean Diff.	SE of diff.	N1	N2	t	DF
	Mean of Arch_CS	30.8
	Difference between means	-3.085									GFP_CS - Arch_CS
	SE of difference	4.787									CS1	6.903	8.677	-1.774	5.003	8	11	0.3546	13.75
	95% CI of difference	-13.19 to 7.015									CS2	8.361	8.515	-0.154	3.631	8	11	0.04243	16.1
											CS3	22.86	24.71	-1.846	8.954	8	11	0.2062	10.04
	Data summary										CS4	30.47	35.28	-4.811	9.168	8	11	0.5247	13.34
	Number of columns (Group)	2									CS5	51.43	54.54	-3.105	10.41	8	11	0.2984	15.45
	Number of rows (Time)	6									CS6	46.28	53.1	-6.823	8.185	8	11	0.8337	16.69
	Number of subjects (Subject)	19
	Number of missing values	0

## Sheet: Figure 6E_Train_noCS_Data
	Figure 6E, Training no CS
	GFP_CS								Arch_CS
Mouse ID	FU2273	FU2970	FU3017	FU3539	FU3542	FU3543	FV1291	FV1335	FU2202	FU3015	FU3016	FU3537	FU3544	FU3565	FU3566	FV1288	FV1317	FV1336	FU2203
CS #1	5.66667	8.22222	0	25.8889	13.8889	21.6667	0.222222	0	2	15.5556	0	7.33333	7	0	13.3333	18.3333	0	21.5556	0
CS #2	4.44444	10.5556	2.44444	56.3333	43	14.8889	12.2222	2.44444	32.4444	57.5556	8.22222	20.8889	41.8889	47.4445	17	37.3333	29.3333	16.7778	6.55556
CS #3	33.6667	3.11111	13.2222	45.1111	36.2222	70.1111	34.1111	9.66667	28.5556	35.1111	47.8889	30.6667	27.1111	18.7778	8.22222	47.5555	14.8889	60.2222	7.77778
CS #4	31.3333	46.3333	33.5556	91.4445	57.5556	90.6667	35.4444	60.2222	84.6667	45	80.6667	59.7778	69.3333	75.6667	35.8889	54.3333	61.6667	95.6667	46.3333
CS #5	43.3333	46.5556	20.2222	73.8889	66.2222	100	56.3333	71.3333	59.2222	98.4444	87.2222	72.4445	95	59.2222	68.7778	56.8889	65.1111	79.7778	28.1111
CS #6	61.6667	38	9.77778	92.1111	77.2222	80.7778	51.1111	13	80.5556	92.2222	78.2222	76.1111	63.2222	54	16.5556	58.8889	90.5556	82.3333	62.6667

## Sheet: Figure 6E_Train_noCS_Stats
	Figure 6E, Training no CS
	Two-way RM ANOVA	Matching: Stacked									Post-hoc
	Assume sphericity?	No									Compare row means (main row effect)
	Alpha	0.05
											Number of families	1
	Source of Variation	% of total variation	P value	P value summary	Significant?	Geisser-Greenhouse's epsilon					Number of comparisons per family	6
	Time x Group	1.138	0.4059	ns	No						Alpha	0.05
	Time	53.22	<0.0001	****	Yes	0.8055
	Group	1.42	0.3118	ns	No						Šídák's multiple comparisons test	Mean Diff.	95.00% CI of diff.	Below threshold?	Summary	Adjusted P Value
	Subject	22.21	<0.0001	****	Yes
											GFP_noCS - Arch_noCS
	ANOVA table	SS	DF	MS	F (DFn, DFd)	P value					CS1	1.707	-11.73 to 15.15	No	ns	0.9993
	Time x Group	1110	5	222	F (5, 85) = 1.029	P=0.4059					CS2	-10.39	-37.23 to 16.46	No	ns	0.8267
	Time	51919	5	10384	F (4.027, 68.47) = 48.12	P<0.0001					CS3	0.9457	-27.77 to 29.67	No	ns	>0.9999
	Group	1385	1	1385	F (1, 17) = 1.087	P=0.3118					CS4	-8.635	-40.47 to 23.20	No	ns	0.9597
	Subject	21671	17	1275	F (17, 85) = 5.908	P<0.0001					CS5	-10.28	-42.28 to 21.71	No	ns	0.9175
	Residual	18341	85	215.8							CS6	-15.71	-55.68 to 24.27	No	ns	0.8065
	Difference between column means
	Mean of GFP_CS	37.82									Test details	Mean 1	Mean 2	Mean Diff.	SE of diff.	N1	N2	t	DF
	Mean of Arch_CS	44.88
	Difference between means	-7.06									GFP_noCS - Arch_noCS
	SE of difference	6.773									CS1	9.444	7.737	1.707	4.349	8	11	0.3925	13.14
	95% CI of difference	-21.35 to 7.230									CS2	18.29	28.68	-10.39	8.694	8	11	1.195	13.2
											CS3	30.65	29.71	0.9457	9.256	8	11	0.1022	12.83
	Data summary										CS4	55.82	64.45	-8.635	10.23	8	11	0.8439	12.65
	Number of columns (Group)	2									CS5	59.74	70.02	-10.28	10.4	8	11	0.9887	13.5
	Number of rows (Time)	6									CS6	52.96	68.67	-15.71	12.68	8	11	1.239	11.77
	Number of subjects (Subject)	19
	Number of missing values	0

## Sheet: Figure 6G_Ret_CS_Data
	Figure 6G, Retrieval CS
	GFP_CS								Arch_CS
Mouse ID	FU2273	FU2970	FU3017	FU3539	FU3542	FU3543	FV1291	FV1335	FU2202	FU3015	FU3016	FU3537	FU3544	FU3565	FU3566	FV1288	FV1317	FV1336	FU2203
CS #1	56.2222	50.5556	57.2222	67.6667	80.4444	48.6667	51.8889	4	47.4445	49.6667	65.5556	70	21	13.4444	22.2222	62.7778	67.1111	71	43.6667
CS #2	53.4445	37.8889	68.5556	53.5555	77.7778	35.6667	28.8889	32.1111	47.1111	79	55	75.2222	56.3333	58.2222	25.7778	65.6667	69.5556	63.1111	38.5555
CS #3	20.7778	39.1111	81.7778	57.5556	65.1111	47	40.6667	10.7778	58.5556	90.6667	65.2222	62.8889	16.4444	46.1111	42.7778	61.3333	59.8889	60.5555	48
CS #4	36.7778	59	54.6667	75.3333	82.6667	45.5556	34	26.5556	74.4444	72.2222	35.3333	56.7778	38.8889	32.3333	31.2222	49.3333	67.4444	63.1111	40.8889

## Sheet: Figure 6G_Ret_CS_Stats
	Figure 6G, Retrieval CS
	Two-way RM ANOVA	Matching: Stacked									Post-hoc
	Assume sphericity?	No									Compare row means (main row effect)
	Alpha	0.05
											Number of families	1
	Source of Variation	% of total variation	P value	P value summary	Significant?	Geisser-Greenhouse's epsilon					Number of comparisons per family	4
	Time x Group	2.564	0.1935	ns	No						Alpha	0.05
	Time	0.3284	0.8854	ns	No	0.9752
	Group	1.014	0.6241	ns	No						Šídák's multiple comparisons test	Mean Diff.	95.00% CI of diff.	Below threshold?	Summary	Adjusted P Value
	Subject	69.19	<0.0001	****	Yes
											GFP_CS - Arch_CS
	ANOVA table	SS	DF	MS	F (DFn, DFd)	P value					CS1	3.548	-25.04 to 32.14	No	ns	0.9947
	Time x Group	673.1	3	224.4	F (3, 51) = 1.632	P=0.1935					CS2	-9.11	-31.71 to 13.49	No	ns	0.7149
	Time	86.22	3	28.74	F (2.926, 49.73) = 0.2091	P=0.8854					CS3	-10.33	-38.74 to 18.08	No	ns	0.7768
	Group	266.2	1	266.2	F (1, 17) = 0.2491	P=0.6241					CS4	0.7285	-24.04 to 25.49	No	ns	>0.9999
	Subject	18165	17	1069	F (17, 51) = 7.773	P<0.0001
	Residual	7011	51	137.5
	Difference between column means
	Mean of GFP_CS	49.43									Test details	Mean 1	Mean 2	Mean Diff.	SE of diff.	N1	N2	t	DF
	Mean of Arch_CS	53.22
	Difference between means	-3.791									GFP_CS - Arch_CS
	SE of difference	7.594									CS1	52.08	48.54	3.548	10.1	8	11	0.3513	14.87
	95% CI of difference	-19.81 to 12.23									CS2	48.49	57.6	-9.11	7.921	8	11	1.15	14.04
											CS3	45.35	55.68	-10.33	9.83	8	11	1.051	12.9
	Data summary										CS4	51.82	51.09	0.7285	8.612	8	11	0.08459	13.32
	Number of columns (Group)	2
	Number of rows (Time)	4
	Number of subjects (Subject)	19
	Number of missing values	0

## Sheet: Figure 6G_Ret_noCS_Data
	Figure 6G, Retrieval no CS
	GFP_CS								Arch_CS
Mouse ID	FU2273	FU2970	FU3017	FU3539	FU3542	FU3543	FV1291	FV1335	FU2202	FU3015	FU3016	FU3537	FU3544	FU3565	FU3566	FV1288	FV1317	FV1336	FU2203
CS #1	12.1111	22.7778	52.7778	42.4444	55.3333	38.3333	40.1111	15.7778	56.5556	63.3333	76.5556	76.6667	25.5556	32.3333	50.2222	41.4445	28.1111	22.6667	30.7778
CS #2	34	17.6667	42.7778	16.8889	15.2222	17.2222	38.6667	7.22222	66.3333	62.1111	53.1111	27	32.2222	14.6667	17.1111	14.6667	14.6667	16	37.3333
CS #3	30.7778	23.3333	55.1111	27.1111	19.2222	27.4444	32.5556	23.3333	47.3333	92.7778	37.6667	38	53.7778	31.5556	18.7778	25.5556	52.8889	68.4444	27.4444
CS #4	34.8889	31.8889	16	40.4444	51.8889	10.2222	30.1111	11.7778	73.3333	55	26.3333	62.5555	5.77778	50	41.3333	31.5556	59.4445	16.8889	28.3333

## Sheet: Figure 6G_Ret_noCS_Stats
	Figure 6G, Retrieval no CS
	Two-way RM ANOVA	Matching: Stacked									Post-hoc
	Assume sphericity?	No									Compare row means (main row effect)
	Alpha	0.05
											Number of families	1
	Source of Variation	% of total variation	P value	P value summary	Significant?	Geisser-Greenhouse's epsilon					Number of comparisons per family	4
	Time x Group	0.388	0.9349	ns	No						Alpha	0.05
	Time	5.805	0.1238	ns	No	0.8211
	Group	9.588	0.0512	ns	No						Šídák's multiple comparisons test	Mean Diff.	95.00% CI of diff.	Below threshold?	Summary	Adjusted P Value
	Subject	37.04	0.0089	**	Yes
											GFP_CS - Arch_CS
	ANOVA table	SS	DF	MS	F (DFn, DFd)	P value					CS1	-10.88	-34.20 to 12.44	No	ns	0.612
	Time x Group	103.9	3	34.64	F (3, 51) = 0.1411	P=0.9349					CS2	-8.585	-29.58 to 12.41	No	ns	0.7168
	Time	1555	3	518.2	F (2.463, 41.88) = 2.112	P=0.1238					CS3	-15.07	-36.38 to 6.243	No	ns	0.2344
	Group	2568	1	2568	F (1, 17) = 4.400	P=0.0512					CS4	-12.56	-35.37 to 10.26	No	ns	0.4629
	Subject	9920	17	583.5	F (17, 51) = 2.378	P=0.0089
	Residual	12516	51	245.4
	Difference between column means
	Mean of GFP_CS	29.23									Test details	Mean 1	Mean 2	Mean Diff.	SE of diff.	N1	N2	t	DF
	Mean of Arch_CS	41.01
	Difference between means	-11.77									GFP_CS - Arch_CS
	SE of difference	5.612									CS1	34.96	45.84	-10.88	8.36	8	11	1.301	16.71
	95% CI of difference	-23.61 to 0.06830									CS2	23.71	32.29	-8.585	7.535	8	11	1.139	16.85
											CS3	29.86	44.93	-15.07	7.579	8	11	1.988	15.64
	Data summary										CS4	28.4	40.96	-12.56	8.196	8	11	1.532	16.99
	Number of columns (Group)	2
	Number of rows (Time)	4
	Number of subjects (Subject)	19
	Number of missing values	0
