# Supplementary material for: A striatal circuit balances learned fear in the presence and absence of sensory cues
Source: eLife. 2023 Jan 19;12:e75703. doi: 10.7554/eLife.75703 (PMC9897731; doi:10.7554/eLife.75703)
Supplement: Figure 7—source data 1. [file elife-75703-fig7-data1.xlsx]

## Sheet: Figure 7G_Data
	Figure 7G - rabies virus labelling in D1R mice
		Cell number per structure		Cell density (per mm3)
	Structure	Mouse 1	Mouse 2	Mouse 1	Mouse 2	Average cells	Average density
	S2	264	313	34.7077	29.2743	288.5	31.991
	InsCtx	96	200	48.5688	23.313	148	35.9409
	S1 mouth	55	159	25.6054	8.85722	107	17.2313
	S1 barrel	28	136	21.6293	4.45308	82	13.0412
	S1 nose	13	79	26.1669	4.30595	46	15.2364
	PIR	2	86	7.43506	0.172908	44	3.80399
	MO	11	72	2.94474	0.449891	41.5	1.69732
	GPe	40	40	25.5621	25.5621	40	25.5621
	AI	9	43	5.4471	1.14009	26	3.2936
	EP	3	42	15.0403	1.0743	22.5	8.05728
	CeA	8	26	19.7418	6.07441	17	12.9081
	VPM	6	27	14.5168	3.22595	16.5	8.87136
	PF	8	18	37.0375	16.4611	13	26.7493
	BLA	3	19	9.99852	1.57871	11	5.78861
	ECT	5	10	5.84031	2.92015	7.5	4.38023
	S1 u. limb	2	13	3.44877	0.53058	7.5	1.98967
	S1 unass.	2	12	9.50622	1.58437	7	5.54529
	ENT	4	10	0.877433	0.350973	7	0.614203
	PO	5	8	6.38662	3.99164	6.5	5.18913
	PoT	7	1	25.0356	3.57651	4	14.306
	TeA	3	4	1.28937	0.96703	3.5	1.1282
	AUD	3	4	0.517755	0.69034	3.5	0.604047
	LA	1	0	1.19007	0	0.5	0.595034
	PIL	0	0	0	0	0	0
	Others	179	36	4.315	5.16549	107.5	4.74024

## Sheet: Figure 7H_Data
	Figure 7H - rabies virus labelling in Adora mice
		Cell number per structure		Cell density (per mm3)
	Structure	Mouse A	Mouse B	Mouse A	Mouse B	Average cells	Average density
	S2	550	387	60.988	42.9134	468.5	51.9507
	InsCtx	300	157	72.8531	38.1265	228.5	55.4898
	S1 mouth	60	111	9.66243	17.8755	85.5	13.769
	S1 barrel	162	74	25.7643	11.7689	118	18.7666
	S1 nose	125	116	41.4033	38.4223	120.5	39.9128
	PIR	16	59	1.38327	5.1008	37.5	3.24203
	MO	42	34	1.71777	1.39057	38	1.55417
	GPe	92	52	58.7929	33.2307	72	46.0118
	AI	67	32	8.48734	4.05366	49.5	6.2705
	EP	18	45	6.44583	16.1146	31.5	11.2802
	CeA	95	54	72.1336	41.0023	74.5	56.568
	VPM	12	19	6.4519	10.2155	15.5	8.3337
	PF	77	26	158.438	53.4986	51.5	105.968
	BLA	149	38	78.4094	19.997	93.5	49.2032
	ECT	22	36	12.8487	21.0251	29	16.9369
	S1 u. limb	17	1	4.50993	0.26529	9	2.38761
	S1 unass.	25	7	19.8046	5.54529	16	12.675
	ENT	13	20	1.14066	1.75487	16.5	1.44776
	PO	17	12	13.5716	9.57994	14.5	11.5758
	PoT	17	6	60.8007	21.4591	11.5	41.1299
	TeA	38	39	12.249	12.5714	38.5	12.4102
	AUD	50	39	8.62925	6.73081	44.5	7.68003
	LA	34	25	40.4623	29.7517	29.5	35.107
	PIL	2	1	11.3867	5.69333	1.5	8.54
	Others	248	234	7.99279	7.90239	241	7.94759
