# Supplementary material for: A striatal circuit balances learned fear in the presence and absence of sensory cues
Source: eLife. 2023 Jan 19;12:e75703. doi: 10.7554/eLife.75703 (PMC9897731; doi:10.7554/eLife.75703)
Supplement: Figure 7—source data 2. [file elife-75703-fig7-data2.xlsx]

## Sheet: Figure 7- source data 2
	Figure 7 - source data 2
	Abbreviation	Allen Brain atlas	Franklin and Paxinos
	AI	Agranular insular area	Agranular insular cortex (dorsal, ventral and posterior)
	AUD	Auditory areas (dorsal and ventral)	Auditory cortex (dorsal, primary and ventral)
	BLA	Basolateral amygdalar nucleus (anterior, posterior and ventral)	Basolateral amygdaloid nucleus (anterior, posterior)
	CeA	Central amygdalar nucleus (capsular, medial and lateral)	Central amygdaloid nucleus (capsular, medial and lateral)
	Ect	Ectorhinal area	Ectorhinal cortex
	ENT	Entorhinal area	Entorhinal cortex
	EP	Endopiriform nucleus	Claustrum (dorsal, ventral and endopiriform)
	GPe	Globus pallidus, external segment	Globus pallidus
	GPi	Globus pallidus, internal segment	Entopenduncular nucleus
	InsCtx	Gustatory areas and Visceral area	Insular cortex (granular and dysgranular)
	LA	Lateral amygdalar nucleus	Lateral amygdaloid nucleus
	MO	Primary motor area	Primary motor cortex
	PF	Parafascicular nucleus	Parafascicular thalamic nucleus
	PIL	Posterior intralaminar thalamic nucleus	Posterior intralaminar thalamic nucleus
	PIR	Piriform area	Piriform cortex
	PO	Posterior complex of the thalamus	Posterior thalamic nuclear group
	PoT	Posterior triangular thalamic nucleus	Posterior thalamic nuclear group, triangular part
	S1 barrel	Primary somatosensory area, barrel field	Primary somatosensory cortex, barrel field
	S1 mouth	Primary somatosensory area, mouth	Primary somatosensory cortex, upper lip/barrel field
	S1 nose	Primary somatosensory area, nose	Primary somatosensory cortex, upper lip
	S1 unassigned	Primary somatosensory area, unassigned	Primary somatosensory cortex, dysgranular zone
	S1 upper limb	Primary somatosensory area, upper limb	Primary somatosensory cortex, shoulder region
	S2	Supplemental somatosensory area	Secondary somatosensory cortex
	SNR	Substantia nigra, reticular part	Substantia nigra, reticular part
	TeA	Temporal association areas	Temporal association cortex
	VPM	Ventral posteromedial nucleus of the thalamus	Ventral posteromedial thalamic nucleus
