# Supplementary material for: A striatal circuit balances learned fear in the presence and absence of sensory cues
Source: eLife. 2023 Jan 19;12:e75703. doi: 10.7554/eLife.75703 (PMC9897731; doi:10.7554/eLife.75703)
Supplement: Figure 8—source data 1. [file elife-75703-fig8-data1.xlsx]

## Sheet: Figure 8E_EPSC_data
	Figure 8E, EPSC
	D1R	Adora
	0.51	0.12
	0.7	1.21
	6.84	2.04
	12.03	0.207
	6.92	1.698
	8.43	1.462
	18.94	2.167
	15	1.173
	12.59	4.642
	10.46	3.25
	6.42	1.666
	5.92	0.835
		0.971
		1.241
		4.394
		6.101
		7.319
		6.315
		1.379

## Sheet: Figure 8E_EPSC_Stats
	Figure 8E, EPSC
	Mann Whitney test				Shapiro-Wilk normality test	D1R	Adora
	P value	0.002			W	0.9632	0.8472
	Exact or approximate P value?	Exact			P value	0.8285	0.006
	P value summary	**			Passed normality test (alpha=0.05)?	Yes	No
	Significantly different (P < 0.05)?	Yes			P value summary	ns	**
	One- or two-tailed P value?	Two-tailed
	Sum of ranks in column A,B	266 , 230
	Mann-Whitney U	40
	Difference between medians
	Median of column A	7.675, n=12
	Median of column B	1.666, n=19
	Difference: Actual	-6.009
	Difference: Hodges-Lehmann	-5.731
	Descriptive statistics	D1R	Adora
	Number of values	12	19
	Minimum	0.51	0.12
	25% Percentile	6.045	1.173
	Median	7.675	1.666
	75% Percentile	12.45	4.394
	Maximum	18.94	7.319
	Range	18.43	7.199
	Mean	8.73	2.536
	Std. Deviation	5.432	2.167
	Std. Error of Mean	1.568	0.4971
	Lower 95% CI of mean	5.279	1.492
	Upper 95% CI of mean	12.18	3.581

## Sheet: Figure 8E_Delay_data
	Figure 8E, delay
	D1R	Adora
	1.225	1.89895
	1.83541	1.64063
	1.4147	1.73211
	1.75528	2.0619
	1.88159	1.90206
	2.04326	1.9896
	1.85206	1.98486
	1.68763	1.51259
	1.87208	1.81788
	1.51463	1.70093
	2.65775	1.82682
	2.24015	2.06337
		2.25549
		2.32099
		1.68035
		2.10948
		2.44396

## Sheet: Figure 8E_Delay_Stats
	Figure 8E, delay
	Unpaired t test
	P value	0.3724			Shapiro-Wilk normality test	D1R	Adora
	P value summary	ns			W	0.9572	0.9781
	Significantly different (P < 0.05)?	No			P value	0.7434	0.9373
	One- or two-tailed P value?	Two-tailed			Passed normality test (alpha=0.05)?	Yes	Yes
	t, df	t=0.9071, df=27			P value summary	ns	ns
	How big is the difference?
	Mean of column A	1.938
	Mean of column C	1.832
	Difference between means (C - A) ± SEM	-0.1061 ± 0.1170
	95% confidence interval	-0.3462 to 0.1339
	R squared (eta squared)	0.02957
	F test to compare variances
	F, DFn, Dfd	2.208, 11, 16
	P value	0.1459
	P value summary	ns
	Significantly different (P < 0.05)?	No
	Data analyzed
	Sample size, column A	17
	Sample size, column C	12
	Descriptive statistics	D1R	Adora
	Number of values	12	17
	Minimum	1.225	1.513
	25% Percentile	1.558	1.717
	Median	1.844	1.902
	75% Percentile	2.003	2.086
	Maximum	2.658	2.444
	Range	1.433	0.9314
	Mean	1.832	1.938
	Std. Deviation	0.3775	0.2541
	Std. Error of Mean	0.109	0.06162
	Lower 95% CI of mean	1.592	1.807
	Upper 95% CI of mean	2.071	2.068

## Sheet: Figure 8F_PPR_data
	Figure 8F, PPR
	Adora	D1R
	1.29	0.72
	0.98	0.58
	0.8	1.01
	1.19	0.81
	1.08	0.63
	0.61	0.67
	0.72	0.72
	0.94	0.97
	0.61	0.81
	0.66	0.75
	1.22	0.55
	0.78	0.56
	1.08
	0.77
	0.6
	0.65
	0.56
	0.5

## Sheet: Figure 8F_PPR_Stats
	Figure 8F, PPR
	Unpaired t test
	P value	0.2082				Shapiro-Wilk normality test	D1R	Adora
	P value summary	ns				W	0.9176	0.9263
	Significantly different (P < 0.05)?	No				P value	0.117	0.3429
	One- or two-tailed P value?	Two-tailed				Passed normality test (alpha=0.05)?	Yes	Yes
	t, df	t=1.288, df=28				P value summary	ns	ns
	How big is the difference?
	Mean of column A	0.8356
	Mean of column B	0.7317
	Difference between means (B - A) ± SEM	-0.1039 ± 0.08064
	95% confidence interval	-0.2691 to 0.06130
	R squared (eta squared)	0.05596
	F test to compare variances
	F, DFn, Dfd	2.791, 17, 11
	P value	0.088
	P value summary	ns
	Significantly different (P < 0.05)?	No
	Data analyzed
	Sample size, column A	18
	Sample size, column B	12
	Descriptive statistics	Adora	D1R
	Number of values	18	12
	Minimum	0.5	0.55
	25% Percentile	0.61	0.5925
	Median	0.775	0.72
	75% Percentile	1.08	0.81
	Maximum	1.29	1.01
	Range	0.79	0.46
	Mean	0.8356	0.7317
	Std. Deviation	0.2502	0.1498
	Std. Error of Mean	0.05897	0.04324
	Lower 95% CI of mean	0.7111	0.6365
	Upper 95% CI of mean	0.96	0.8268

## Sheet: Figure 8-Suppl1_EI_Data
	Figure 8 - figure supplement 1 , E/I ratio
	Adora	D1R
	1.06	4.35102
	1.47	6.49338
	2.57	2.8531
	1.49	2.88471
	0.55	1.77583
	2.21	2.39259
	1.74	3.87156
	0.68	4.12709
	1.33	4.09849
	1.23	1.93762
	0.89	1.86609
	5.1	1.08505
	2.68
	1.14

## Sheet: Figure 8-Suppl1_EI_Stats
		Figure 8 - figure supplement 1 , E/I ratio
		Mann Whitney test
		P value	0.0054			Shapiro-Wilk normality test	Adora	D1R
		Exact or approximate P value?	Exact			W	0.8015	0.9326
		P value summary	**			P value	0.0052	0.4084
		Significantly different (P < 0.05)?	Yes			Passed normality test (alpha=0.05)?	No	Yes
		One- or two-tailed P value?	Two-tailed			P value summary	**	ns
		Sum of ranks in column A,B	136 , 215
		Mann-Whitney U	31
		Difference between medians
		Median of column A	1.400, n=14
		Median of column E	2.869, n=12
		Difference: Actual	1.469
		Difference: Hodges-Lehmann	1.385
		Descriptive statistics	Adora	D1R
		Number of values	14	12
		Minimum	0.55	1.085
		25% Percentile	1.018	1.884
		Median	1.4	2.869
		75% Percentile	2.3	4.12
		Maximum	5.1	6.493
		Range	4.55	5.408
		Mean	1.724	3.145
		Std. Deviation	1.168	1.508
		Std. Error of Mean	0.3121	0.4352
		Lower 95% CI of mean	1.05	2.187
		Upper 95% CI of mean	2.399	4.103

## Sheet: Figure 8-Suppl1_delay_Data
	Figure 8 - figure supplement 1 , delay
	EPSC_Adora	IPSC_Adora	EPSC_D1R	IPSC_D1R
	1.89895	3.31595	1.225	3.865
	1.64063	3.18392	1.83541	1.85919
	1.73211	3.38295	1.4147	2.99004
	2.0619	3.4759	1.75528	2.64177
	1.90206	3.56969	1.88159	2.76281
	1.9896	3.7489	2.04326	2.81377
	1.98486	3.4506	1.85206	3.15391
	1.51259	3.43052	1.68763	2.49069
	1.81788	4.08961	1.87208	2.6326
	1.70093	3.47195	1.51463	3.24377
	1.82682	3.38894	2.65775	3.35288
	2.06337	4.08288	2.24015	3.49262
	2.25549	3.54369
	2.32099	4.0916
	1.68035	3.54049
	2.10948	4.72132
	2.44396	3.50475

## Sheet: Figure 8-Suppl1_delay_Stats
	Figure 8 - figure supplement 1 , delay
	Adora			D1R
	Wilcoxon matched-pairs signed rank test			Paired t test					Shapiro-Wilk normality test	EPSC_Adora	IPSC_Adora	EPSC_D1R	IPSC_D1R
	P value	<0.0001		P value	0.0001				W	0.9781	0.8208	0.9572	0.9823
	Exact or approximate P value?	Exact		P value summary	***				P value	0.9373	0.004	0.7434	0.9911
	P value summary	****		Significantly different (P < 0.05)?	Yes				Passed normality test (alpha=0.05)?	Yes	No	Yes	Yes
	Significantly different (P < 0.05)?	Yes		One- or two-tailed P value?	Two-tailed				P value summary	ns	**	ns	ns
	One- or two-tailed P value?	Two-tailed		t, df	t=5.831, df=11
	Sum of positive, negative ranks	153.0 , 0.000		Number of pairs	12
	Sum of signed ranks (W)	153
	Number of pairs	17		How big is the difference?					Descriptive statistics	EPSC_Adora	IPSC_Adora	EPSC_D1R	IPSC_D1R
	Number of ties (ignored)	0		Mean of differences (D - C)	1.11				Number of values	17	17	12	12
				SD of differences	0.6595
	Median of differences			SEM of differences	0.1904				Minimum	1.513	3.184	1.225	1.859
	Median	1.668		95% confidence interval	0.6910 to 1.529				25% Percentile	1.717	3.41	1.558	2.635
				R squared (partial eta squared)	0.7555				Median	1.902	3.505	1.844	2.902
	How effective was the pairing?								75% Percentile	2.086	3.916	2.003	3.326
	rs (Spearman)	0.5833		How effective was the pairing?					Maximum	2.444	4.721	2.658	3.865
	P value (one tailed)	0.0078		Correlation coefficient (r)	-0.03267				Range	0.9314	1.537	1.433	2.006
	P value summary	**		P value (one tailed)	0.4599
	Was the pairing significantly effective?	Yes		P value summary	ns				Mean	1.938	3.647	1.832	2.942
				Was the pairing significantly effective?	No				Std. Deviation	0.2541	0.3875	0.3775	0.5285
									Std. Error of Mean	0.06162	0.09397	0.109	0.1526
									Lower 95% CI of mean	1.807	3.447	1.592	2.606
									Upper 95% CI of mean	2.068	3.846	2.071	3.277
