# Supplementary material for: A striatal circuit balances learned fear in the presence and absence of sensory cues
Source: eLife. 2023 Jan 19;12:e75703. doi: 10.7554/eLife.75703 (PMC9897731; doi:10.7554/eLife.75703)
Supplement: Figure 9—source data 1. [file elife-75703-fig9-data1.xlsx]

## Sheet: Figure 9D_AN_D1R_Data
	Figure 9D, A/N ratio, D1R
	CS only	CS + US
	1.11	6.23
	1.63	3.99
	2.04	2.17
	1.43	2.9
	3.06	3.45
	2.37	3.33
	3.97	3.53
	2.6	3.26
	1.82	4.17
	2.02	6.04
	2.43	5.02
		2.99

## Sheet: Figure 9D_AN_D1R_Stats
	Figure 9D, A/N ratio, D1R
	Unpaired t test
	P value	0.001				Shapiro-Wilk normaliy test	CS only	CS + US
	P value summary	***				W	0.9533	0.9059
	Significantly different (P < 0.05)?	Yes				P value	0.6867	0.1888
	One- or two-tailed P value?	Two-tailed				Passed normality test (alpha=0.05)?	Yes	Yes
	t, df	t=3.833, df=21				P value summary	ns	ns
	How big is the difference?
	Mean of column A	2.225
	Mean of column B	3.923
	Difference between means (B - A) ± SEM	1.698 ± 0.4430
	95% confidence interval	0.7767 to 2.619
	R squared (eta squared)	0.4116
	F test to compare variances
	F, DFn, Dfd	2.442, 11, 10
	P value	0.1707
	P value summary	ns
	Significantly different (P < 0.05)?	No
	Data analyzed
	Sample size, column A	11
	Sample size, column B	12
	Descriptive statistics	CS only	CS + US
	Number of values	11	12
	Minimum	1.11	2.17
	25% Percentile	1.63	3.058
	Median	2.04	3.49
	75% Percentile	2.6	4.808
	Maximum	3.97	6.23
	Range	2.86	4.06
	Mean	2.225	3.923
	Std. Deviation	0.801	1.252
	Std. Error of Mean	0.2415	0.3613
	Lower 95% CI of mean	1.687	3.128
	Upper 95% CI of mean	2.764	4.719

## Sheet: Figure 9D_PPR_D1R_Data
	Figure 9D, PPR, D1R
	CS only	CS + US
	0.56	0.67
	0.6	1.07
	0.33	0.72
	0.71	1.06
	0.66	0.41
	0.78	0.53
	0.36	0.28
	0.49	0.74
	1	0.39
	0.91	0.13
	0.27	0.72
		0.6

## Sheet: Figure 9D_PPR_D1R_Stats
	Figure 9D, PPR, D1R
	Unpaired t test
	P value	0.9739				Shapiro-Wilk normaliy test	CS only	CS + US
	P value summary	ns				W	0.9689	0.9582
	Significantly different (P < 0.05)?	No				P value	0.8747	0.7576
	One- or two-tailed P value?	Two-tailed				Passed normality test (alpha=0.05)?	Yes	Yes
	t, df	t=0.03315, df=21				P value summary	ns	ns
	How big is the difference?
	Mean of column A	0.6064
	Mean of column B	0.61
	Difference between means (B - A) ± SEM	0.003636 ± 0.1097
	95% confidence interval	-0.2245 to 0.2317
	R squared (eta squared)	5.234e-05
	F test to compare variances
	F, DFn, Dfd	1.458, 11, 10
	P value	0.5603
	P value summary	ns
	Significantly different (P < 0.05)?	No
	Data analyzed
	Sample size, column A	11
	Sample size, column B	12
	Descriptive statistics	CS only	CS + US
	Number of values	11	12
	Minimum	0.27	0.13
	25% Percentile	0.36	0.395
	Median	0.6	0.635
	75% Percentile	0.78	0.735
	Maximum	1	1.07
	Range	0.73	0.94
	Mean	0.6064	0.61
	Std. Deviation	0.236	0.2849
	Std. Error of Mean	0.07115	0.08225
	Lower 95% CI of mean	0.4478	0.429
	Upper 95% CI of mean	0.7649	0.791

## Sheet: Figure 9G_AN_Adora_Data
	Figure 9G, A/N ratio, Adora
	CS only	CS + US
	1.25	0.66
	1.12	1.37
	1.77	1.26
	1.5	0.17
	1.73	0.62
	2.47	1.31
	1.12	2.57
	2.97	3.87
	2.18	2.04
	2.44	1.61
	4.75	1.13
	3.3	2.57

## Sheet: Figure 9G_AN_Adora_Stats
	Figure 9G, A/N ratio, Adora
	Unpaired t test
	P value	0.1624				Shapiro-Wilk normaliy test	CS only	CS + US
	P value summary	ns				W	0.892	0.94
	Significantly different (P < 0.05)?	No				P value	0.1252	0.4976
	One- or two-tailed P value?	Two-tailed				Passed normality test (alpha=0.05)?	Yes	Yes
	t, df	t=1.445, df=22				P value summary	ns	ns
	How big is the difference?
	Mean of column A	2.217
	Mean of column B	1.598
	Difference between means (B - A) ± SEM	-0.6183 ± 0.4278
	95% confidence interval	-1.505 to 0.2688
	R squared (eta squared)	0.08673
	F test to compare variances
	F, DFn, Dfd	1.084, 11, 11
	P value	0.896
	P value summary	ns
	Significantly different (P < 0.05)?	No
	Data analyzed
	Sample size, column A	12
	Sample size, column B	12
	Descriptive statistics	CS only	CS + US
	Number of values	12	12
	Minimum	1.12	0.17
	25% Percentile	1.313	0.7775
	Median	1.975	1.34
	75% Percentile	2.845	2.438
	Maximum	4.75	3.87
	Range	3.63	3.7
	Mean	2.217	1.598
	Std. Deviation	1.069	1.027
	Std. Error of Mean	0.3085	0.2963
	Lower 95% CI of mean	1.538	0.9461
	Upper 95% CI of mean	2.896	2.251

## Sheet: Figure 9G_PPR_Adora_Data
	Figure 9G, PPR, Adora
	CS only	CS+US
	1.23	0.9
	0.32	0.75
	0.27	0.77
	0.23	0.97
	0.2	0.42
	0.15	0.36
	0.21	1.09
	0.71	1.29
	0.49	0.36
	0.23	0.76
	0.27	0.65
	0.34	0.75

## Sheet: Figure 9G_PPR_Adora_Stats
	Figure 9G, PPR, Adora
	Mann Whitney test
	P value	0.001				Shapiro-Wilk normaliy test	CS only	CS + US
	Exact or approximate P value?	Exact				W	0.7043	0.9447
	P value summary	**				P value	0.0009	0.5618
	Significantly different (P < 0.05)?	Yes				Passed normality test (alpha=0.05)?	No	Yes
	One- or two-tailed P value?	Two-tailed				P value summary	***	ns
	Sum of ranks in column A,B	96 , 204
	Mann-Whitney U	18
	Difference between medians
	Median of column A	0.2700, n=12
	Median of column B	0.7550, n=12
	Difference: Actual	0.485
	Difference: Hodges-Lehmann	0.44
	Descriptive statistics	CS only	CS+US
	Number of values	12	12
	Minimum	0.15	0.36
	25% Percentile	0.215	0.4775
	Median	0.27	0.755
	75% Percentile	0.4525	0.9525
	Maximum	1.23	1.29
	Range	1.08	0.93
	Mean	0.3875	0.7558
	Std. Deviation	0.3062	0.2862
	Std. Error of Mean	0.0884	0.08263
	Lower 95% CI of mean	0.1929	0.574
	Upper 95% CI of mean	0.5821	0.9377
